# Supplementary material for: Cationic strontium hydride complexes supported by an NNNN-type macrocycle
Source: Royal Society of Chemistry journal article supplement (doi:10.1039/d1cc02040d), 2021-01-01
Supplement: d1cc02040d1.pdf [file d1cc02040d1.pdf]

# Electronic Supporting Information

## **Cationic Strontium Hydride Complexes Supported by an NNNN-Type Macrocycle**

Thomas Höllerhage,<sup>a</sup> Ambre Carpentier,<sup>b</sup> Thomas P. Spaniol,<sup>a</sup> Laurent Maron,<sup>b</sup> Ulli Englert<sup>a</sup> and Jun Okuda<sup>\*a</sup>

<sup>a</sup> T. Höllerhage, T. P. Spaniol, U. Englert, J. Okuda, Institute of Inorganic Chemistry, RWTH Aachen University, Landoltweg 1, 52056 Aachen, Germany, email: [jun.okuda@ac.rwth-aachen.de](mailto:jun.okuda@ac.rwth-aachen.de)

<sup>b</sup> L. Maron, Ambre Carpentier, CNRS, INSA, UPS, UMR 5215, LPCNO, Université de Toulouse 135 avenue de Ranguéil, 31077 Toulouse, France, email: [laurent.maron@irsamc.ups-tlse.fr](mailto:laurent.maron@irsamc.ups-tlse.fr)

## Table of Contents

|      |                                                                                                                                                                            |    |
|------|----------------------------------------------------------------------------------------------------------------------------------------------------------------------------|----|
| 1    | General Remarks .....                                                                                                                                                      | 3  |
| 2    | Synthetic Procedures and Characterizations .....                                                                                                                           | 4  |
| 2.1  | Synthesis of $[(\text{Me}_4\text{TACD})\text{Sr}(\text{CH}_2\text{Ph})_2]$ ( <b>1a</b> ) .....                                                                             | 4  |
| 2.2  | Molecular Structure of $[(\text{Me}_4\text{TACD})\text{Sr}(\text{CH}_2\text{Ph})_2(\text{thf})]$ ( <b>1</b> ) .....                                                        | 4  |
| 2.3  | Synthesis of $[(\text{Me}_4\text{TACD})\text{Sr}(\text{CH}_2\text{Ph})(\text{thf})][\text{B}(\text{C}_6\text{H}_3\text{-}3,5\text{-Me}_2)_4]$ ( <b>2</b> ) .....           | 5  |
| 2.4  | NMR Spectra of $[(\text{Me}_4\text{TACD})\text{Sr}(\text{CH}_2\text{Ph})(\text{thf})][\text{B}(\text{C}_6\text{H}_3\text{-}3,5\text{-Me}_2)_4]$ ( <b>2</b> ) .....         | 6  |
| 2.5  | Synthesis of $[(\text{Me}_4\text{TACD})\text{Sr}(\text{thf})_2][\text{B}(\text{C}_6\text{H}_3\text{-}3,5\text{-Me}_2)_4]_2$ ( <b>3</b> ) .....                             | 8  |
| 2.6  | NMR spectra of $[(\text{Me}_4\text{TACD})\text{Sr}(\text{thf})_2][\text{B}(\text{C}_6\text{H}_3\text{-}3,5\text{-Me}_2)_4]_2$ ( <b>3</b> ) .....                           | 9  |
| 2.7  | Synthesis of $[(\text{Me}_4\text{TACD})\text{Ca}(\text{thf})_2][\text{B}(\text{C}_6\text{H}_3\text{-}3,5\text{-Me}_2)_4]_2$ ( <b>3-Ca</b> ) .....                          | 11 |
| 2.8  | NMR spectra of $[(\text{Me}_4\text{TACD})\text{Ca}(\text{thf})_2][\text{B}(\text{C}_6\text{H}_3\text{-}3,5\text{-Me}_2)_4]_2$ ( <b>3-Ca</b> ) .....                        | 12 |
| 2.9  | Synthesis of $[(\text{Me}_4\text{TACD})_3\text{Sr}_3(\mu\text{-H})_4(\text{thf})][\text{B}(\text{C}_6\text{H}_3\text{-}3,5\text{-Me}_2)_4]_2$ ( <b>4</b> ) .....           | 14 |
| 2.10 | NMR Spectra of $[(\text{Me}_4\text{TACD})_3\text{Sr}_3(\mu\text{-H})_4(\text{thf})][\text{B}(\text{C}_6\text{H}_3\text{-}3,5\text{-Me}_2)_4]_2$ ( <b>4</b> ) .....         | 15 |
| 2.11 | Molecular Structure of $[(\text{Me}_4\text{TACD})_3\text{Sr}_3(\mu\text{-H})_4(\text{thf})][\text{B}(\text{C}_6\text{H}_3\text{-}3,5\text{-Me}_2)_4]_2$ ( <b>4</b> ) ..... | 18 |
| 2.12 | Synthesis of $[(\text{Me}_4\text{TACD})_2\text{CaSr}(\mu\text{-H})_2(\text{thf})][\text{B}(\text{C}_6\text{H}_3\text{-}3,5\text{-Me}_2)_4]_2$ ( <b>5</b> ) .....           | 19 |
| 2.13 | NMR spectra of $[(\text{Me}_4\text{TACD})_2\text{CaSr}(\mu\text{-H})_2(\text{thf})][\text{B}(\text{C}_6\text{H}_3\text{-}3,5\text{-Me}_2)_4]_2$ ( <b>5</b> ) .....         | 20 |
| 2.14 | Molecular Structure of $[(\text{Me}_4\text{TACD})_2\text{CaSr}(\mu\text{-H})_2(\text{thf})][\text{B}(\text{C}_6\text{H}_3\text{-}3,5\text{-Me}_2)_4]_2$ ( <b>5</b> ) ..... | 23 |
| 3    | Reactivity Studies .....                                                                                                                                                   | 24 |
| 4    | Crystal Structure Determinations .....                                                                                                                                     | 29 |
| 5    | Computational Details .....                                                                                                                                                | 32 |
| 5.1  | NBO Information for $[(\text{Me}_4\text{TACD})_3\text{Sr}_3(\mu\text{-H})_4(\text{thf})]^{2+}$ ( <b>4</b> ) .....                                                          | 32 |
| 5.2  | Orbitals and bond length for $[(\text{Me}_4\text{TACD})_3\text{Sr}_3(\mu\text{-H})_4(\text{thf})]^{2+}$ ( <b>4</b> ) .....                                                 | 33 |
| 5.3  | NBO Information for <b>5</b> .....                                                                                                                                         | 34 |
| 5.4  | Orbitals and bond length for $[(\text{Me}_4\text{TACD})_2\text{CaSrH}_2(\text{THF})]^{2+}$ ( <b>5</b> ) .....                                                              | 34 |
| 6.   | References .....                                                                                                                                                           | 40 |

## 1 General Remarks

All operations were performed under an inert atmosphere of dry argon using standard Schlenk line or glovebox techniques. THF- $d_6$ , THF, benzene and n-pentane were distilled under argon from sodium/benzophenone ketyl prior to use. Hydrogen (99.999%) and deuterium (99.8%) were purchased from Praxair-Westfalen AG. Commercially available reagents were dried over  $\text{CaH}_2$  and distilled, or in case of solids, sublimed before use.  $^1\text{H}$ ,  $^2\text{H}$ ,  $^{11}\text{B}\{^1\text{H}\}$ ,  $^{13}\text{C}\{^1\text{H}\}$ , and  $^{29}\text{Si}\{^1\text{H}\}$  spectra were recorded on a Bruker Avance II 400 or a Bruker Avance III HD 400 spectrometer at 25 °C in J. Young-type NMR tubes. Chemical shifts for  $^1\text{H}$ ,  $^2\text{H}$  and  $^{13}\text{C}\{^1\text{H}\}$  spectra were referenced internally using the residual solvent resonance and are reported relative to tetramethylsilane.  $^{11}\text{B}\{^1\text{H}\}$  and  $^{29}\text{Si}\{^1\text{H}\}$  were referenced externally to  $\text{BF}_3(\text{OEt}_2)$  and  $\text{SiMe}_4$ . The resonances in the  $^1\text{H}$  and  $^{13}\text{C}\{^1\text{H}\}$  NMR spectra were assigned on the basis of two-dimensional NMR experiments (COSY, HSQC, HMBC). Elemental analyses were performed on an Elementar vario EL instrument. In several instances, the carbon values were not satisfactory, possibly due to incomplete combustion as the result of carbonate or carbide formation as well as high air- and moisture sensitivity.<sup>[S1]</sup> 1,4,7,10-tetramethyl-1,4,7,10-tetraazacyclododecane ( $\text{Me}_4\text{TACD}$ ),<sup>[S2]</sup>  $[\text{K}(\text{CH}_2\text{Ph})]$ ,<sup>[S3]</sup>  $[\text{NEt}_3\text{H}][\text{B}(\text{C}_6\text{H}_3\text{-3,5-Me}_2)_4]$ ,<sup>[S4]</sup>  $[(\text{Me}_4\text{TACD})\text{Ca}(\text{CH}_2\text{Ph})_2]$ ,<sup>[S4]</sup>  $[(\text{Me}_4\text{TACD})\text{Ca}(\text{CH}_2\text{Ph})(\text{thf})][\text{B}(\text{C}_6\text{H}_3\text{-3,5-Me}_2)_4]$ <sup>[S4]</sup> and  $[\text{Sr}(\text{CH}_2\text{Ph})_2(\text{thf})]$ <sup>[S5]</sup> were prepared using literature procedures.

## 2 Synthetic Procedures and Characterizations

### 2.1 Synthesis of [(Me<sub>4</sub>TACD)Sr(CH<sub>2</sub>Ph)<sub>2</sub>] (**1a**).

To a solution of [SrI<sub>2</sub>(thf)] (827 mg, 2.00 mmol) in THF (7.5 mL) was added a solution of K(CH<sub>2</sub>Ph) (521 mg, 4 mmol) in THF (5 mL) and the resulting suspension stirred for 2 h at room temperature. After centrifugation and filtration, the volume of the filtrate was reduced by two-thirds under reduced pressure and a solution of Me<sub>4</sub>TACD (502 mg, 2.20 mmol) in THF (1 mL) added dropwise. The resulting suspension was stirred for 5 min, centrifuged and the precipitate isolated, washed with n-pentane (3 x 5 mL) and THF (2 x 2 mL) and dried *in vacuo* to give [(Me<sub>4</sub>TACD)Sr(thf)(CH<sub>2</sub>Ph)<sub>2</sub>] as light orange microcrystals (850 mg, 1.70 mmol); yield: 85 %.

Anal. Calc. for C<sub>26</sub>H<sub>42</sub>N<sub>4</sub>Sr (498.27 g mol<sup>-1</sup>): C, 62.67; H, 8.50; N, 11.24. Found: C, 61.09; H, 8.33; N, 11.96 %.

Poor solubility in common solvents precluded NMR spectroscopic analysis.

Single crystals grew by layering a solution of Me<sub>4</sub>TACD in THF on top of a solution of [Sr(CH<sub>2</sub>Ph)<sub>2</sub>(thf)] in THF at -40 °C.

### 2.2 Molecular Structure of [(Me<sub>4</sub>TACD)Sr(CH<sub>2</sub>Ph)<sub>2</sub>(thf)] (**1**).

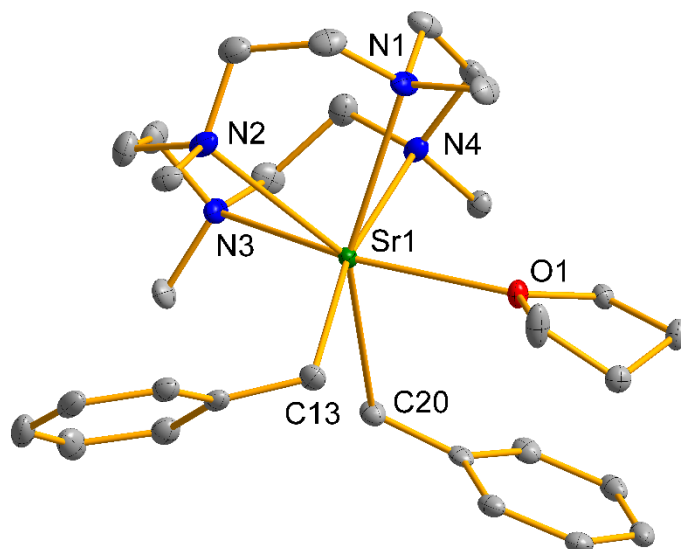

Figure S1: Molecular structure in solid state of **1**. Displacement parameters are shown with 30% probability; hydrogen atoms are omitted for clarity. Selected interatomic distances [Å] and bond angles [°]: Sr1–N1 2.7868(18), Sr1–N2 2.8264(18), Sr1–N3 2.7982(15), Sr1–N4 2.7560(15), Sr1–O1 2.6662(12), Sr1–C13 2.8025(18), Sr1–C20 2.869(2). C13–Sr1–C20 89.14(6), C13–Sr1–O1 79.08(5), C20–Sr1–O1 84.89(6).

### 2.3 Synthesis of [(Me<sub>4</sub>TACD)Sr(CH<sub>2</sub>Ph)(thf)][B(C<sub>6</sub>H<sub>3</sub>-3,5-Me<sub>2</sub>)<sub>4</sub>] (**2**).

A solution of [(Me<sub>4</sub>TACD)Sr(CH<sub>2</sub>Ph)<sub>2</sub>] (100 mg, 0.20 mmol) and [NEt<sub>3</sub>H][B(C<sub>6</sub>H<sub>3</sub>-3,5-Me<sub>2</sub>)<sub>4</sub>] (106 mg, 0.20 mmol) in THF (4 mL) was stirred for 5 min at room temperature, filtered, and the volume of the filtrate reduced by half under reduced pressure. n-Pentane (2 mL) was added dropwise and the resulting suspension stirred for 10 min. The precipitate was isolated, washed with n-pentane (3 x 2 mL) and dried *in vacuo* to give [(Me<sub>4</sub>TACD)Sr(CH<sub>2</sub>Ph)(thf)][B(C<sub>6</sub>H<sub>3</sub>-3,5-Me<sub>2</sub>)<sub>4</sub>] as light orange microcrystals (165 mg, 0.18 mmol); yield: 91%.

Single crystals of THF-free [(Me<sub>4</sub>TACD)Sr(CH<sub>2</sub>Ph)][B(C<sub>6</sub>H<sub>3</sub>-3,5-Me<sub>2</sub>)<sub>4</sub>] (**2a**) grew from the reaction of [(Me<sub>4</sub>TACD)Sr(CH<sub>2</sub>Ph)<sub>2</sub>] with [NEt<sub>3</sub>H][B(C<sub>6</sub>H<sub>3</sub>-3,5-Me<sub>2</sub>)<sub>4</sub>] in THF upon concentration of the mixture *in vacuo*.

<sup>1</sup>H NMR (400 MHz, THF-*d*<sub>8</sub>, 25 °C): δ = 1.46 (s, 2H, CH<sub>2</sub>Ph), 1.74 – 1.80 (m, 4H, THF), 2.09 (s, 24H, Ar-(CH<sub>3</sub>)<sub>2</sub>), 1.82 – 2.24 (br. s, 8H, NCH<sub>2</sub>), 2.26 (s, 12H, NCH<sub>3</sub>), 2.27 – 2.84 (br. s, 8H, NCH<sub>2</sub>), 3.59 – 3.63 (m, 4H, THF), 5.80 – 5.86 (m, 1H, *para*-Ph), 6.20 – 6.26 (m, 2H, *ortho*-Ph), 6.33 – 6.37 (m, 4H, *para*-C<sub>6</sub>H<sub>3</sub>), 6.52 – 6.61 (m, 2H, *meta*-Ph), 6.94 – 6.99 (m, 8H, *ortho*-C<sub>6</sub>H<sub>3</sub>) ppm.

<sup>13</sup>C{<sup>1</sup>H} NMR (101 MHz, THF-*d*<sub>8</sub>, 25 °C): δ = 22.4 (s, Ar-(CH<sub>3</sub>)<sub>2</sub>), 26.4 (s, THF), 45.2 (NCH<sub>3</sub>), 46.8 (s, CH<sub>2</sub>Ph), 54.2 (br. s, NCH<sub>2</sub>), 68.3 (s, THF), 110.0 (s, *para*-Ph), 118.7 (s, *ortho*-Ph), 123.5 (s, *para*-C<sub>6</sub>H<sub>3</sub>), 129.3 (s, *meta*-Ph), 132.8 (q, <sup>3</sup>J<sub>BC</sub> = 2.7 Hz, *meta*-C<sub>6</sub>H<sub>3</sub>), 135.5 (*ortho*-C<sub>6</sub>H<sub>3</sub>), 159.8 (*ipso*-Ph), 165.6 (q, <sup>1</sup>J<sub>BC</sub> = 49.3 Hz, *ipso*-C<sub>6</sub>H<sub>3</sub>) ppm.

<sup>11</sup>B{<sup>1</sup>H} NMR (128 MHz, THF-*d*<sub>8</sub>, 25 °C): δ = -6.96 ppm.

Anal. Calc. for C<sub>55</sub>H<sub>79</sub>BN<sub>4</sub>OSr (910.69 g mol<sup>-1</sup>): C, 72.54; H, 8.74; N, 6.15. Found: C, 69.39; H, 8.34; N, 6.12 %.

## 2.4 NMR Spectra of $[(\text{Me}_4\text{TACD})\text{Sr}(\text{CH}_2\text{Ph})(\text{thf})][\text{B}(\text{C}_6\text{H}_3\text{-}3,5\text{-Me}_2)_4]$ (**2**).

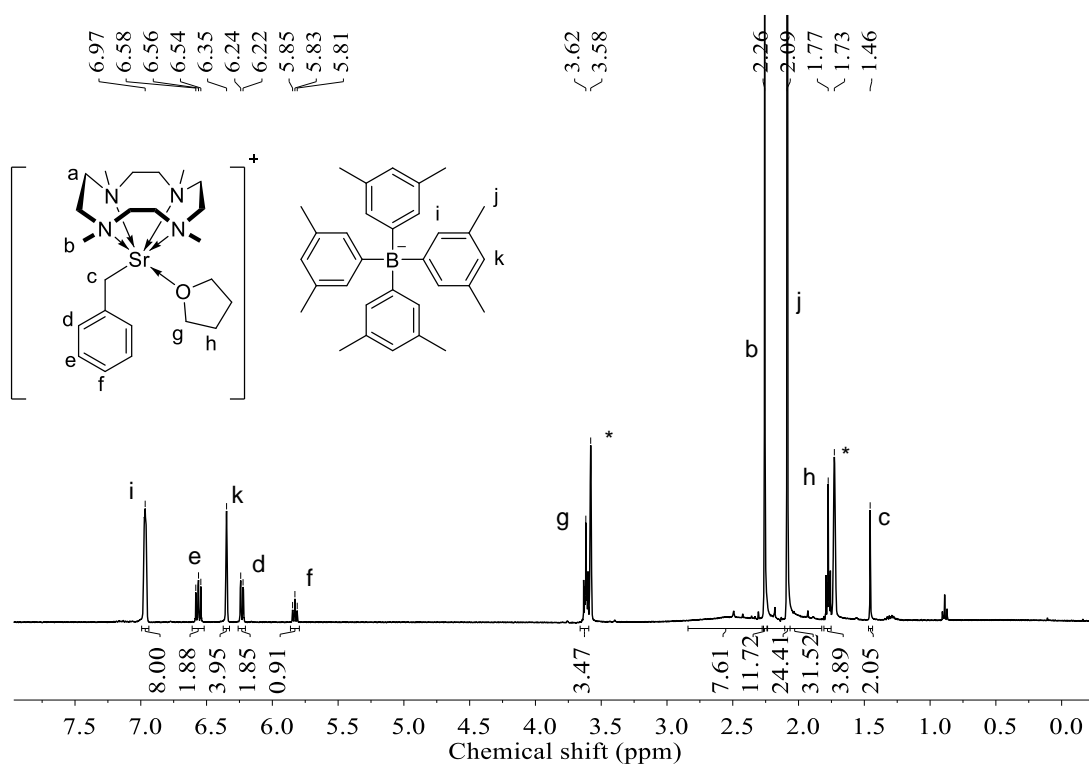

Figure S2:  $^1\text{H}$  NMR spectrum (400 MHz,  $\text{THF-}d_8$  (\*), 25 °C) of  $[(\text{Me}_4\text{TACD})\text{Sr}(\text{CH}_2\text{Ph})(\text{thf})][\text{B}(\text{C}_6\text{H}_3\text{-}3,5\text{-Me}_2)_4]$ . (\*) denotes residual proton resonances of  $\text{THF-}d_8$ .

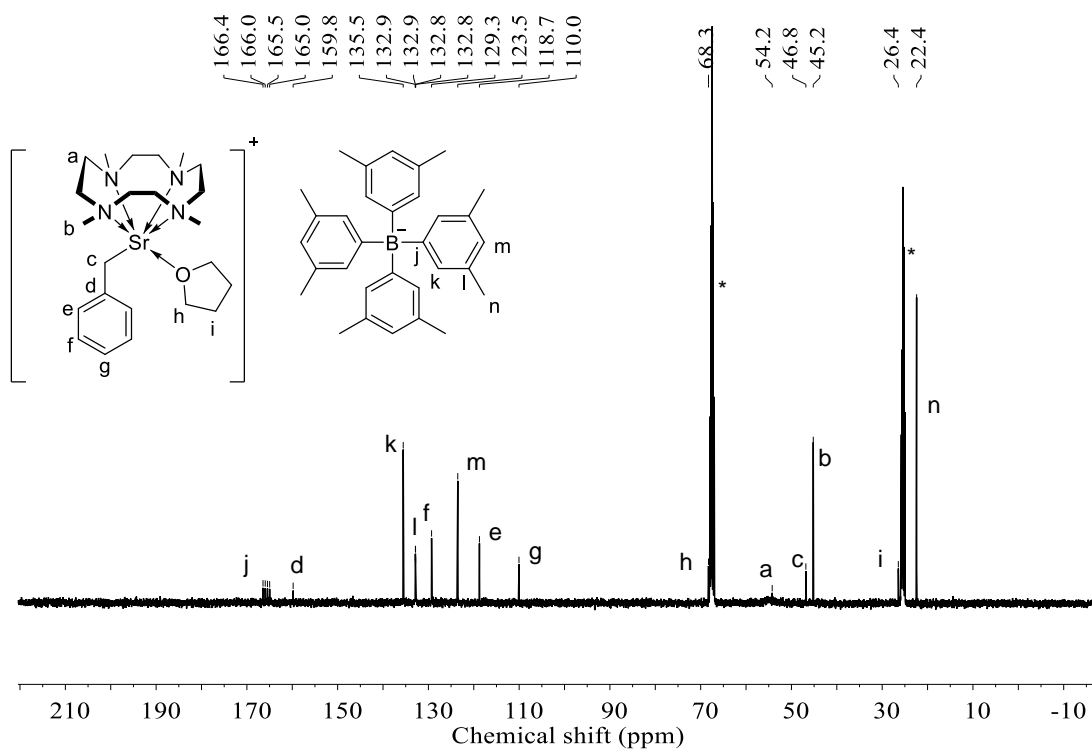

Figure S3:  $^{13}\text{C}\{^1\text{H}\}$  NMR spectrum (101 MHz,  $\text{THF-}d_8$ , 25 °C) of  $[(\text{Me}_4\text{TACD})\text{Sr}(\text{CH}_2\text{Ph})(\text{thf})][\text{B}(\text{C}_6\text{H}_3\text{-}3,5\text{-Me}_2)_4]$ . (\*) denotes carbon resonances of  $\text{THF-}d_8$ .

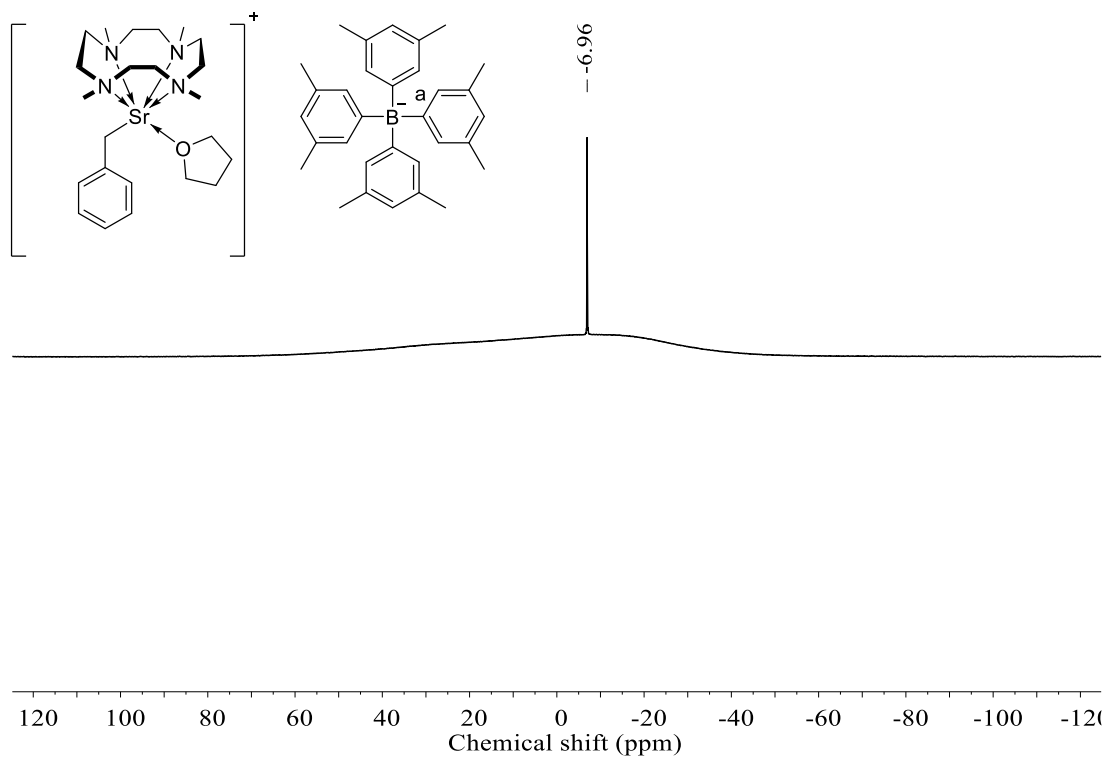

Figure S4:  $^{11}\text{B}\{^1\text{H}\}$  NMR spectrum (128 MHz,  $\text{THF-}d_6$ , 25 °C) of  $[(\text{Me}_4\text{TACD})\text{Sr}(\text{CH}_2\text{Ph})(\text{thf})][\text{B}(\text{C}_6\text{H}_3-3,5-\text{Me}_2)_4]$ .

## 2.5 Synthesis of [(Me<sub>4</sub>TACD)Sr(thf)<sub>2</sub>][B(C<sub>6</sub>H<sub>3</sub>-3,5-Me<sub>2</sub>)<sub>4</sub>]<sub>2</sub> (**3**).

A solution of [(Me<sub>4</sub>TACD)Sr(CH<sub>2</sub>Ph)<sub>2</sub>] (25 mg, 0.05 mmol) and [NEt<sub>3</sub>H][B(C<sub>6</sub>H<sub>3</sub>-3,5-Me<sub>2</sub>)<sub>4</sub>] (53 mg, 0.10 mmol) in THF (2 mL) was stirred for 5 min at room temperature, filtered, and the volume of the filtrate reduced by half under reduced pressure. n-Pentane (2 mL) was added dropwise and the resulting suspension stirred for 5 min. The precipitate was isolated, washed with n-pentane (3 x 2 mL) and dried *in vacuo* to give [(Me<sub>4</sub>TACD)Sr(thf)<sub>2</sub>][B(C<sub>6</sub>H<sub>3</sub>-3,5-Me<sub>2</sub>)<sub>4</sub>]<sub>2</sub> as a colorless powder (60 mg, 4.5·10<sup>-6</sup> mol); yield: 91%.

<sup>1</sup>H NMR (400 MHz, THF-*d*<sub>6</sub>, 25 °C): δ = 1.74 – 1.80 (m, 8H, THF), 2.09 (s, 48H, Ar-(CH<sub>3</sub>)<sub>2</sub>), 1.85 – 3.05 (br. s, 16H, NCH<sub>2</sub>), 2.12 (s, 12H, NCH<sub>3</sub>), 3.59 – 3.63 (m, 8H, THF), 6.34 – 6.40 (m, 8H, *para*-C<sub>6</sub>H<sub>3</sub>), 6.94 – 7.00 (m, 16H, *ortho*-C<sub>6</sub>H<sub>3</sub>) ppm.

<sup>13</sup>C{<sup>1</sup>H} NMR (101 MHz, THF-*d*<sub>6</sub>, 25 °C): δ = 22.5 (s, Ar-(CH<sub>3</sub>)<sub>2</sub>), 26.5 (s, THF), 44.9 (NCH<sub>3</sub>), 55.8 (br. s, NCH<sub>2</sub>), 68.4 (s, THF), 123.7 (s, *para*-C<sub>6</sub>H<sub>3</sub>), 133.1 (q, <sup>3</sup>J<sub>BC</sub> = 2.7 Hz, *meta*-C<sub>6</sub>H<sub>3</sub>), 135.6 (*ortho*-C<sub>6</sub>H<sub>3</sub>), 165.8 (q, <sup>1</sup>J<sub>BC</sub> 49.3 Hz, *ipso*-C<sub>6</sub>H<sub>3</sub>) ppm.

<sup>11</sup>B{<sup>1</sup>H} NMR (128 MHz, THF-*d*<sub>6</sub>, 25 °C): δ = -8.83 ppm.

Anal. Calc. for C<sub>84</sub>H<sub>116</sub>B<sub>2</sub>N<sub>4</sub>O<sub>2</sub>Sr (1332.12 g mol<sup>-1</sup>): C, 76.25; H, 8.84; N, 4.23. Found: C, 75.76; H, 8.89; N, 4.60%.



2.6 NMR spectra of  $[(\text{Me}_4\text{TACD})\text{Sr}(\text{thf})_2][\text{B}(\text{C}_6\text{H}_3\text{-}3,5\text{-Me}_2)_4]_2$  (**3**).

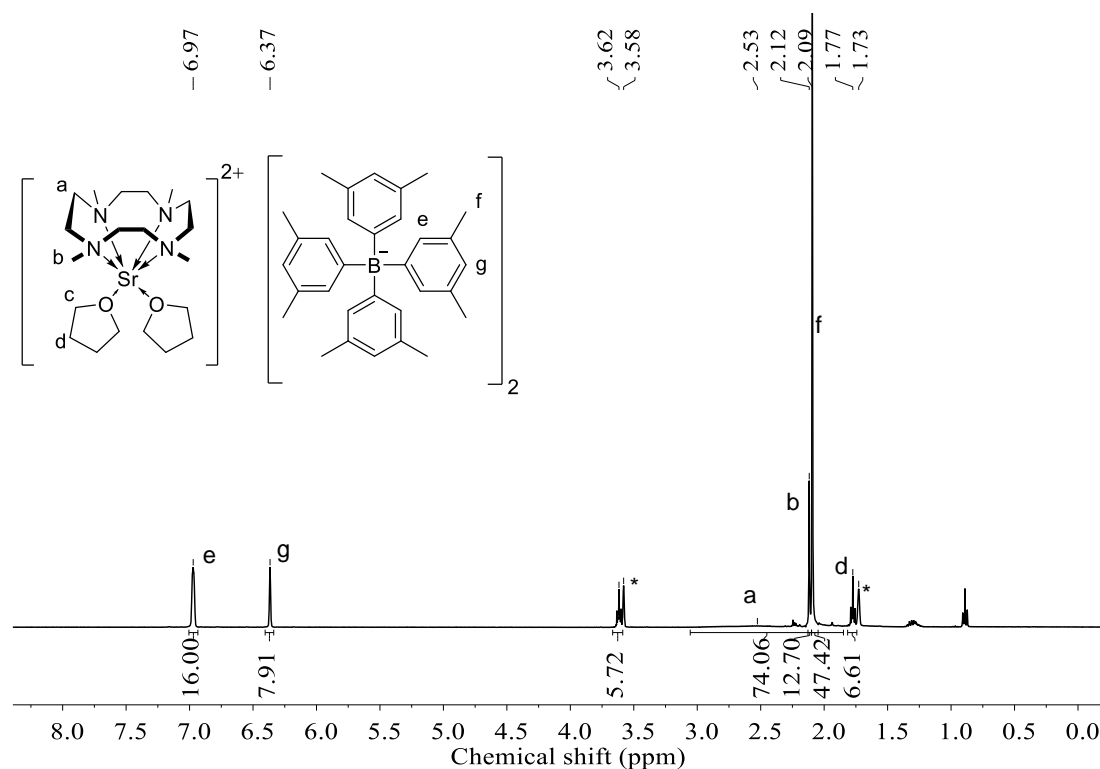

Figure S5:  $^1\text{H}$  NMR spectrum (400 MHz,  $\text{THF-d}_8$ , 25 °C) of  $[(\text{Me}_4\text{TACD})\text{Sr}(\text{thf})_2][\text{B}(\text{C}_6\text{H}_3\text{-}3,5\text{-Me}_2)_4]_2$ . (\*) denotes residual proton resonances of  $\text{THF-d}_8$ .

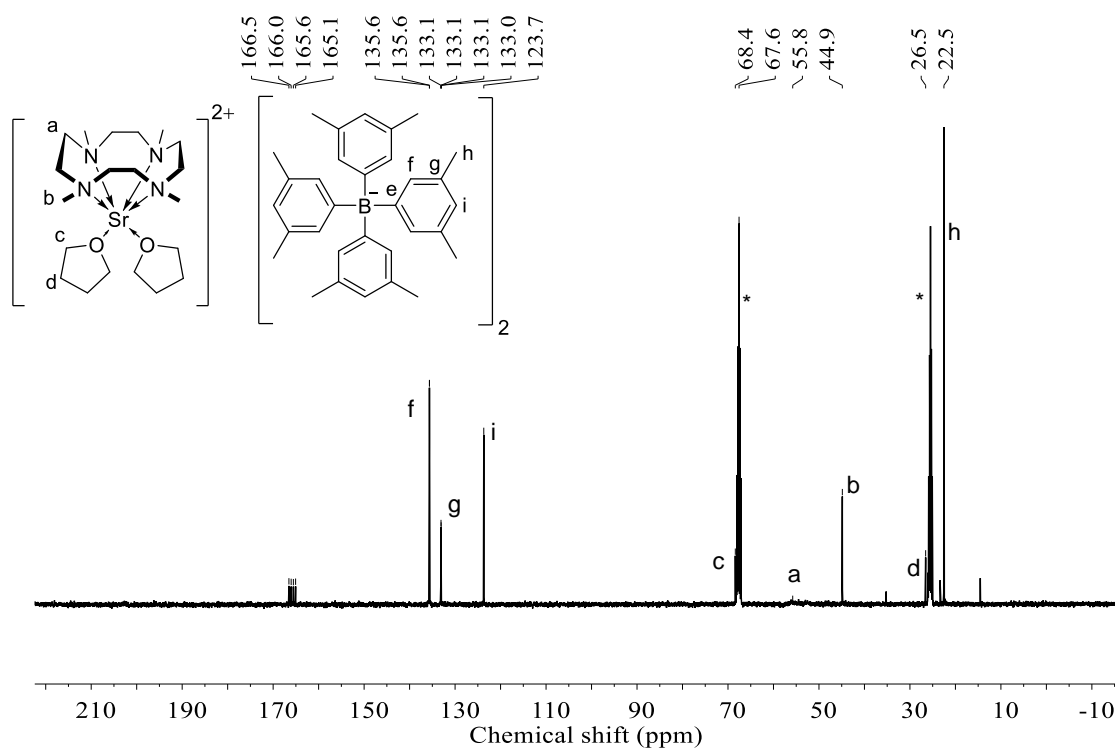

Figure S6:  $^{13}\text{C}\{^1\text{H}\}$  NMR spectrum (101 MHz,  $\text{THF-d}_8$ , 25 °C) of  $[(\text{Me}_4\text{TACD})\text{Sr}(\text{thf})_2][\text{B}(\text{C}_6\text{H}_3\text{-}3,5\text{-Me}_2)_4]_2$ . (\*) denotes carbon resonances of  $\text{THF-d}_8$ .

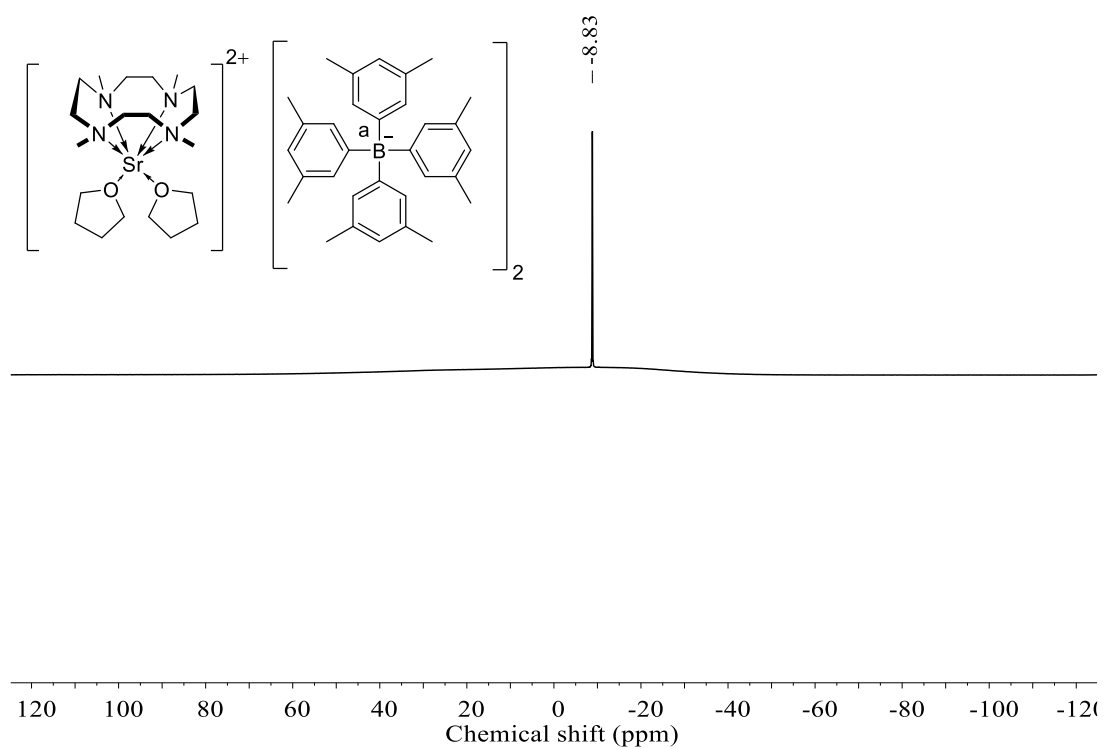

Figure S7:  $^{11}\text{B}\{^1\text{H}\}$  NMR spectrum (128 MHz,  $\text{THF-}d_6$ , 25 °C) of  $[(\text{Me}_4\text{TACD})\text{Sr}(\text{thf})_2][\text{B}(\text{C}_6\text{H}_3\text{-}3,5\text{-Me}_2)_4]_2$ .

## 2.7 Synthesis of [(Me<sub>4</sub>TACD)Ca(thf)<sub>2</sub>][B(C<sub>6</sub>H<sub>3</sub>-3,5-Me<sub>2</sub>)<sub>4</sub>]<sub>2</sub> (**3-Ca**).

A solution of [(Me<sub>4</sub>TACD)Ca(CH<sub>2</sub>Ph)<sub>2</sub>] (45 mg, 0.10 mmol) and [NEt<sub>3</sub>H][B(C<sub>6</sub>H<sub>3</sub>-3,5-Me<sub>2</sub>)<sub>4</sub>] (106 mg, 0.20 mmol) in THF (2 mL) was stirred for 16 h at room temperature. The resulting clear solution was filtered, the volume of the filtrate reduced by half under reduced pressure, layered with n-pentane (2 mL) and stored at -40 °C. After 24 hours colorless crystals grew that were isolated, washed with n-pentane (3 x 2 mL) and dried *in vacuo* to give [(Me<sub>4</sub>TACD)Ca(thf)<sub>2</sub>][B(C<sub>6</sub>H<sub>3</sub>-3,5-Me<sub>2</sub>)<sub>4</sub>]<sub>2</sub> as colorless crystals (115 mg, 0.09 mmol); yield: 90%.

<sup>1</sup>H NMR (400 MHz, THF-*d*<sub>6</sub>, 25 °C): δ = 1.74 – 1.80 (m, 8H, THF), 2.09 (s, 12H, NCH<sub>3</sub>), 2.10 (s, 48H, Ar-(CH<sub>3</sub>)<sub>2</sub>), 2.02 – 2.23 (br. s, 8H, NCH<sub>2</sub>), 2.29 – 2.58 (br. s, 8H, NCH<sub>2</sub>), 3.59 – 3.63 (m, 8H, THF), 6.36 – 6.40 (m, 8H, *para*-C<sub>6</sub>H<sub>3</sub>), 6.96 – 7.00 (m, 16H, *ortho*-C<sub>6</sub>H<sub>3</sub>) ppm.

<sup>13</sup>C{<sup>1</sup>H} NMR (101 MHz, THF-*d*<sub>6</sub>, 25 °C): δ = 22.4 (s, Ar-(CH<sub>3</sub>)<sub>2</sub>), 26.4 (s, THF), 44.4 (NCH<sub>3</sub>), 54.0 (br. s, NCH<sub>2</sub>), 68.3 (s, THF), 123.7 (s, *para*-C<sub>6</sub>H<sub>3</sub>), 133.1 (q, <sup>3</sup>J<sub>BC</sub> = 2.7 Hz, *meta*-C<sub>6</sub>H<sub>3</sub>), 135.5 (*ortho*-C<sub>6</sub>H<sub>3</sub>), 165.8 (q, <sup>1</sup>J<sub>BC</sub> 49.3 Hz, *ipso*-C<sub>6</sub>H<sub>3</sub>) ppm.

<sup>11</sup>B{<sup>1</sup>H} NMR (128 MHz, THF-*d*<sub>6</sub>, 25 °C): δ = -7.00 ppm.

Anal. Calc. for C<sub>84</sub>H<sub>116</sub>B<sub>2</sub>N<sub>4</sub>O<sub>2</sub>Ca (1275.58 g mol<sup>-1</sup>): C, 79.10; H, 9.17; N, 4.73. Found: C, 78.40; H, 9.01; N, 4.78%.

2.8 NMR spectra of  $[(\text{Me}_4\text{TACD})\text{Ca}(\text{thf})_2][\text{B}(\text{C}_6\text{H}_3\text{-}3,5\text{-Me}_2)_4]_2$  (**3-Ca**).

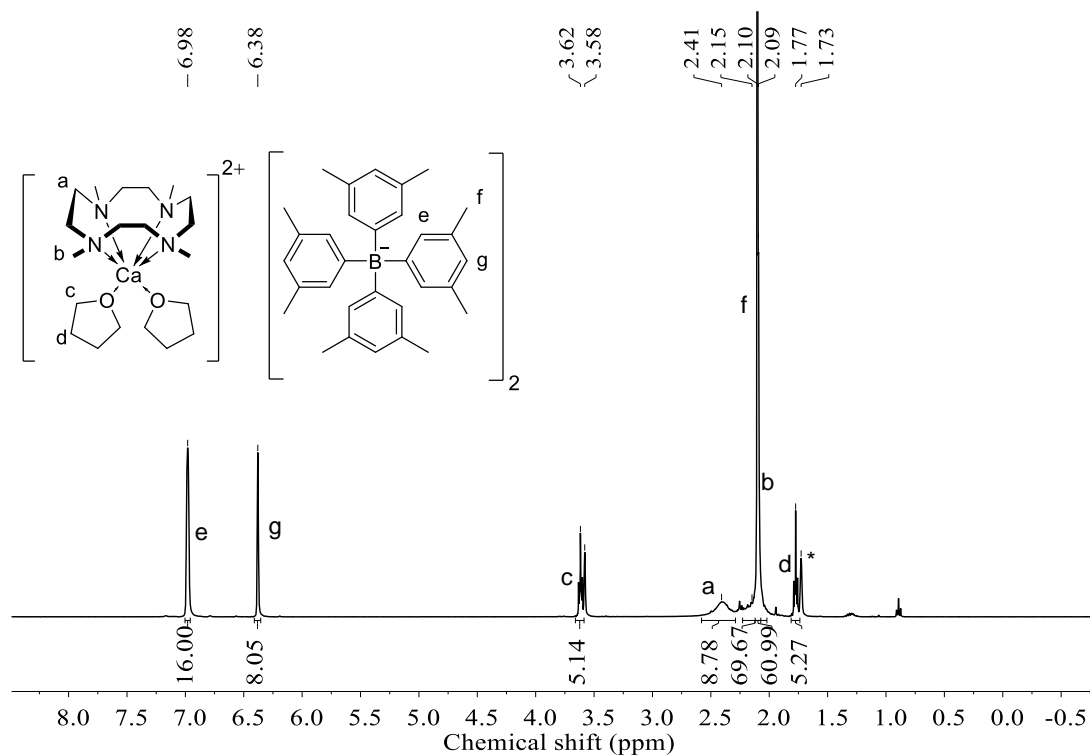

Figure S8:  $^1\text{H}$  NMR spectrum (400 MHz,  $\text{THF-}d_6$ , 25  $^\circ\text{C}$ ) of  $[(\text{Me}_4\text{TACD})\text{Ca}(\text{thf})_2][\text{B}(\text{C}_6\text{H}_3\text{-}3,5\text{-Me}_2)_4]_2$ . (\*) denotes residual proton resonances of  $\text{THF-}d_6$ .

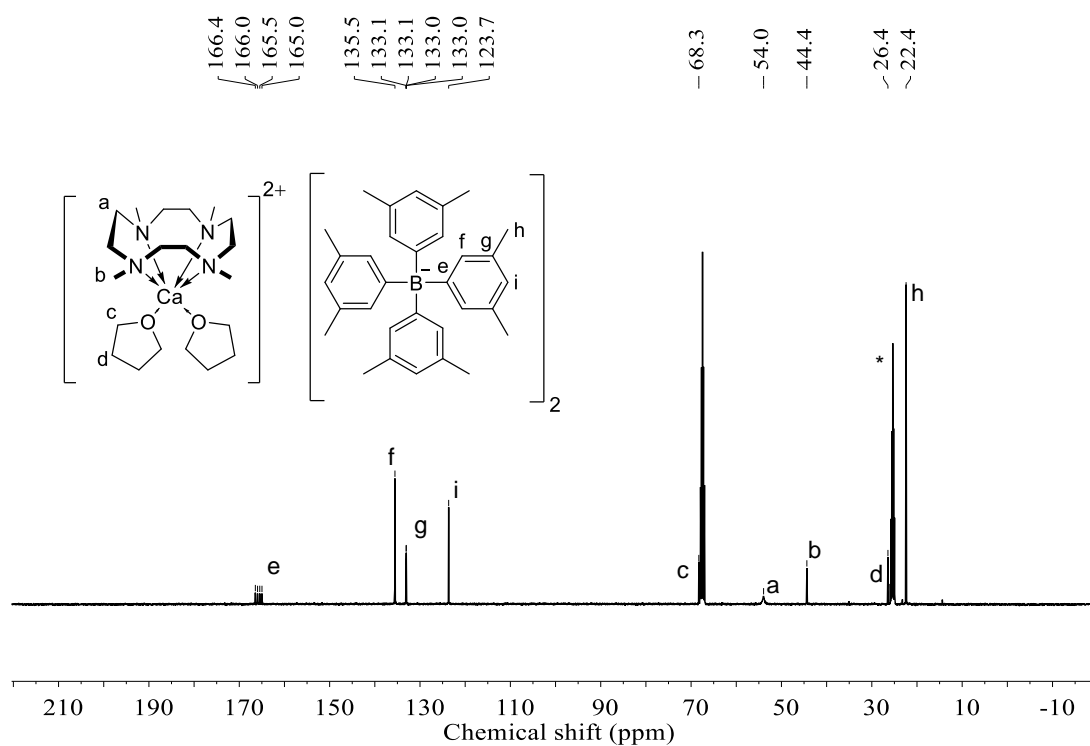

Figure S9:  $^{13}\text{C}\{^1\text{H}\}$  NMR spectrum (101 MHz,  $\text{THF-}d_6$ , 25  $^\circ\text{C}$ ) of  $[(\text{Me}_4\text{TACD})\text{Ca}(\text{thf})_2][\text{B}(\text{C}_6\text{H}_3\text{-}3,5\text{-Me}_2)_4]_2$ . (\*) denotes carbon resonances of  $\text{THF-}d_6$ .

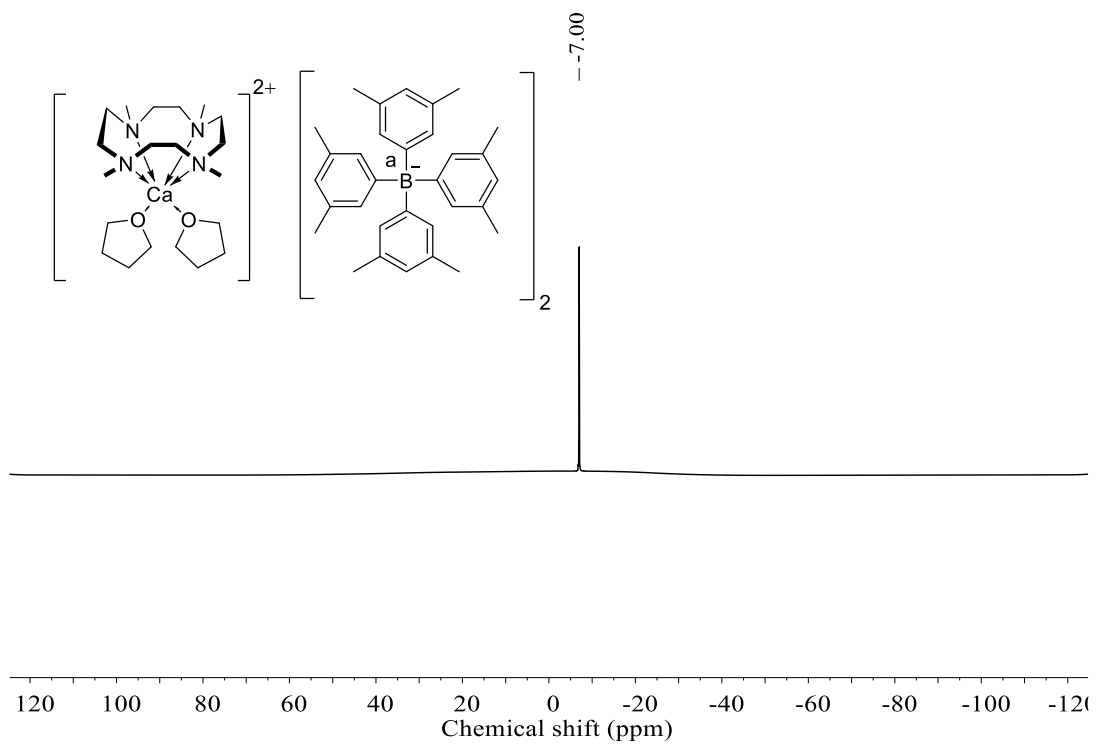

Figure S10:  $^{11}\text{B}\{^1\text{H}\}$  NMR spectrum (128 MHz,  $\text{THF-}d_6$ , 25 °C) of  $[(\text{Me}_4\text{TACD})\text{Ca}(\text{thf})_2][\text{B}(\text{C}_6\text{H}_3\text{-}3,5\text{-Me}_2)_4]_2$ .

## 2.9 Synthesis of $[(\text{Me}_4\text{TACD})_3\text{Sr}_3(\mu\text{-H})_4(\text{thf})][\text{B}(\text{C}_6\text{H}_3\text{-3,5-Me}_2)_4]_2$ (**4**).

A suspension of  $[(\text{Me}_4\text{TACD})\text{Sr}(\text{CH}_2\text{Ph})_2]$  (50 mg, 0.1 mmol) and  $[(\text{Me}_4\text{TACD})\text{Sr}(\text{thf})(\text{CH}_2\text{Ph})][\text{B}(\text{C}_6\text{H}_3\text{-3,5-Me}_2)_4]$  (182 mg, 0.2 mmol) in THF (6 mL) was charged with  $\text{H}_2$  (1 bar) by applying three “freeze-pump-thaw” cycles and stirred for 30 min at room temperature. The resulting clear solution was filtered, the volume reduced to half under reduced pressure, layered with n-pentane (3 mL) and stored at  $-40^\circ\text{C}$  for 16 h. The resulting colorless crystals were isolated, washed with n-pentane (3 x 2 mL) and carefully dried.  $[(\text{Me}_4\text{TACD})_3\text{Sr}_3(\mu\text{-H})_4(\text{thf})][\text{B}(\text{C}_6\text{H}_3\text{-3,5-Me}_2)_4]_2$  was isolated as colorless crystals (145 mg, 0.08 mmol); yield: 77%.

$[(\text{Me}_4\text{TACD})_3\text{Sr}_3(\mu\text{-D})_4(\text{thf})][\text{B}(\text{C}_6\text{H}_3\text{-3,5-Me}_2)_4]_2$  (**4-d<sub>4</sub>**) was prepared analogously using  $\text{D}_2$ .

$^1\text{H}$  NMR (400 MHz,  $\text{THF-}d_6$ ,  $25^\circ\text{C}$ ):  $\delta = 1.74 - 1.80$  (m, 8H, THF), 1.96 – 2.35 (br. s, 16H,  $\text{NCH}_2$ ), 2.09 (s, 48H,  $\text{Ar-}(\text{CH}_3)_2$ ), 2.30 (br. s, 12H,  $\text{NCH}_3$ ), 2.35 – 2.77 (br. s, 32H,  $\text{NCH}_2$ ), 2.51 (s, 24H,  $\text{NCH}_3$ ), 3.59 – 3.63 (m, 8H, THF), 5.99 (s, 4H, Sr-H), 6.32 – 6.36 (m, 8H, *para*- $\text{C}_6\text{H}_3$ ), 6.95 – 6.99 (m, 16H, *ortho*- $\text{C}_6\text{H}_3$ ) ppm.

$^2\text{H}$  NMR (61 MHz,  $\text{THF-}d_6$ ,  $25^\circ\text{C}$ ):  $\delta = 6.08$  ppm.

$^{13}\text{C}\{^1\text{H}\}$  NMR (101 MHz,  $\text{THF-}d_6$ ,  $25^\circ\text{C}$ ):  $\delta = 22.6$  (s,  $\text{Ar-}(\text{CH}_3)_2$ ), 26.6 (s, THF), 44.2 ( $\text{NCH}_3$ ), 45.7 ( $\text{NCH}_3$ ), 54.7 (br. s,  $\text{NCH}_2$ ), 68.4 (s, THF), 123.6 (s, *para*- $\text{C}_6\text{H}_3$ ), 132.9 (q,  $^3J_{\text{BC}} = 2.7$  Hz, *meta*- $\text{C}_6\text{H}_3$ ), 135.7 (*ortho*- $\text{C}_6\text{H}_3$ ), 165.8 (q,  $^1J_{\text{BC}} = 49.3$  Hz, *ipso*- $\text{C}_6\text{H}_3$ ) ppm.

$^{11}\text{B}\{^1\text{H}\}$  NMR (128 MHz,  $\text{THF-}d_6$ ,  $25^\circ\text{C}$ ):  $\delta = -6.95$  ppm.

Anal. Calc. for  $\text{C}_{104}\text{H}_{168}\text{B}_2\text{N}_{12}\text{OSr}_3$  (1887.05 g mol $^{-1}$ ): C, 66.20; H, 8.97; N, 8.91. Found: C, 63.59; H, 8.62; N, 8.28 %.

## 2.10 NMR Spectra of $[(\text{Me}_4\text{TACD})_3\text{Sr}_3(\mu\text{-H})_4(\text{thf})][\text{B}(\text{C}_6\text{H}_3\text{-3,5-Me}_2)_4]_2$ (**4**).

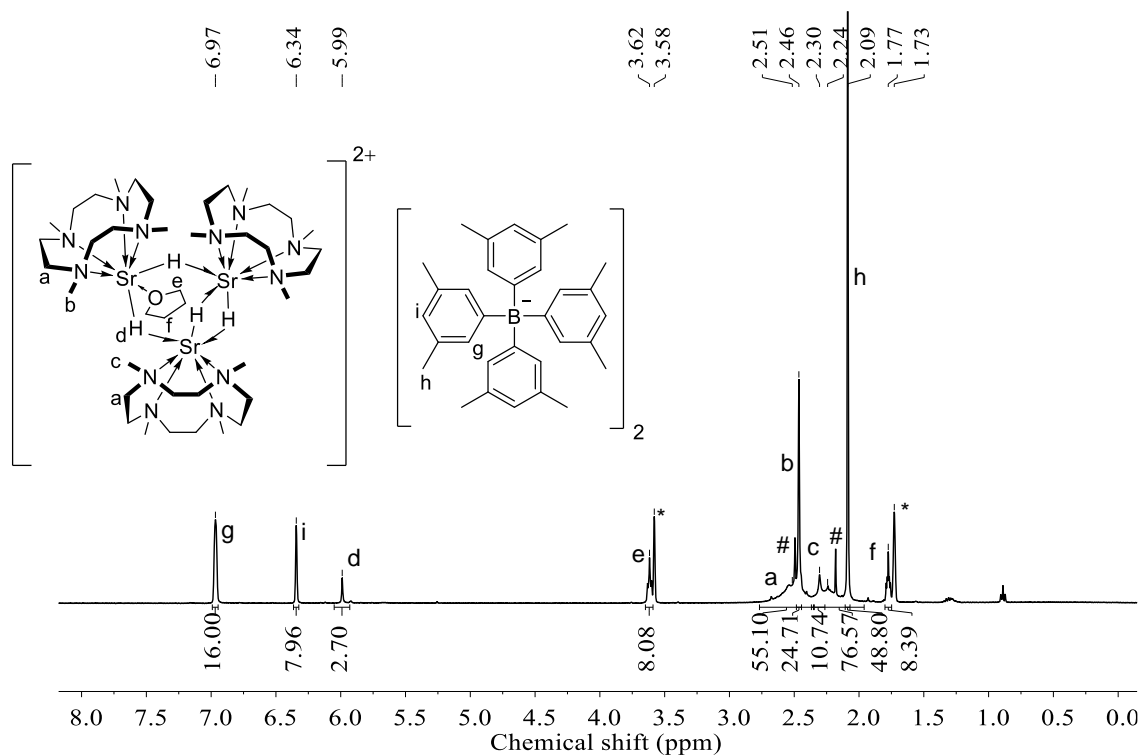

Figure S11:  $^1\text{H}$  NMR spectrum (400 MHz,  $\text{THF-}d_8$ , 25 °C) of  $[(\text{Me}_4\text{TACD})_3\text{Sr}_3(\mu\text{-H})_4(\text{thf})][\text{B}(\text{C}_6\text{H}_3\text{-3,5-Me}_2)_4]_2$ . (\*) denotes residual proton resonances of  $\text{THF-}d_8$ ; #denotes resonances due to free  $\text{Me}_4\text{TACD}$ .

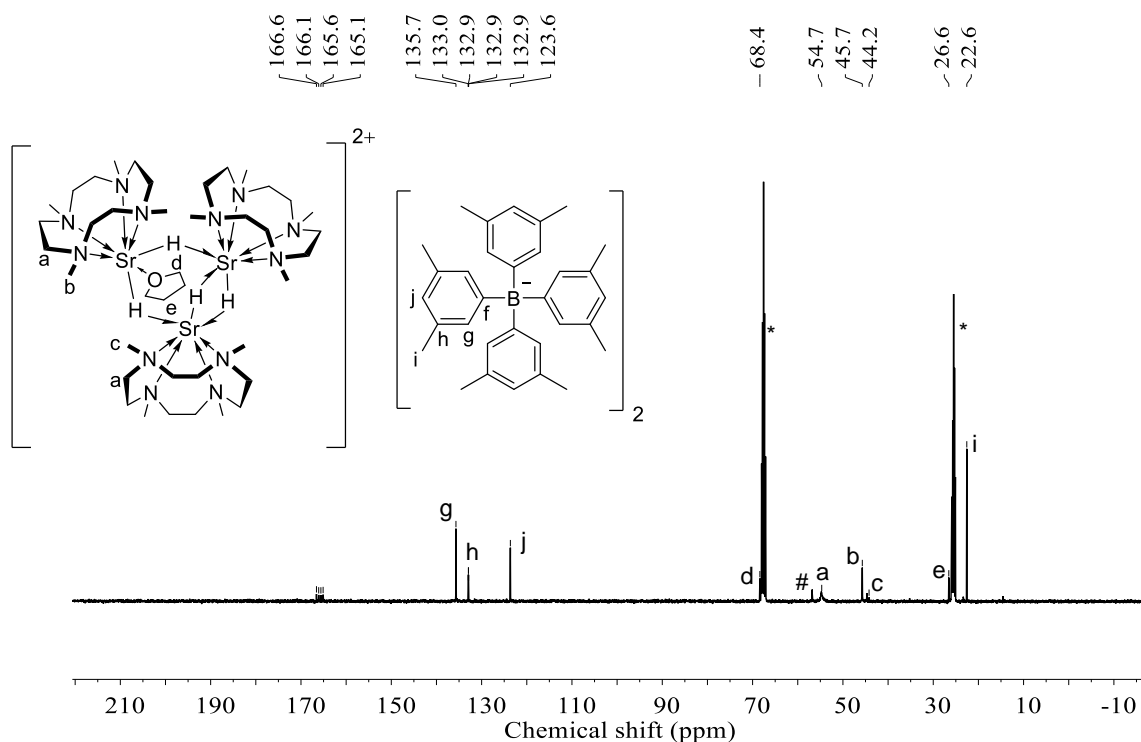

Figure S5:  $^{13}\text{C}\{^1\text{H}\}$  NMR spectrum (101 MHz,  $\text{THF-}d_8$ , 25 °C) of  $[(\text{Me}_4\text{TACD})_3\text{Sr}_3(\mu\text{-H})_4(\text{thf})][\text{B}(\text{C}_6\text{H}_3\text{-3,5-Me}_2)_4]_2$ . (\*) denotes carbon resonances of  $\text{THF-}d_8$ . #denotes resonances due to free  $\text{Me}_4\text{TACD}$ .

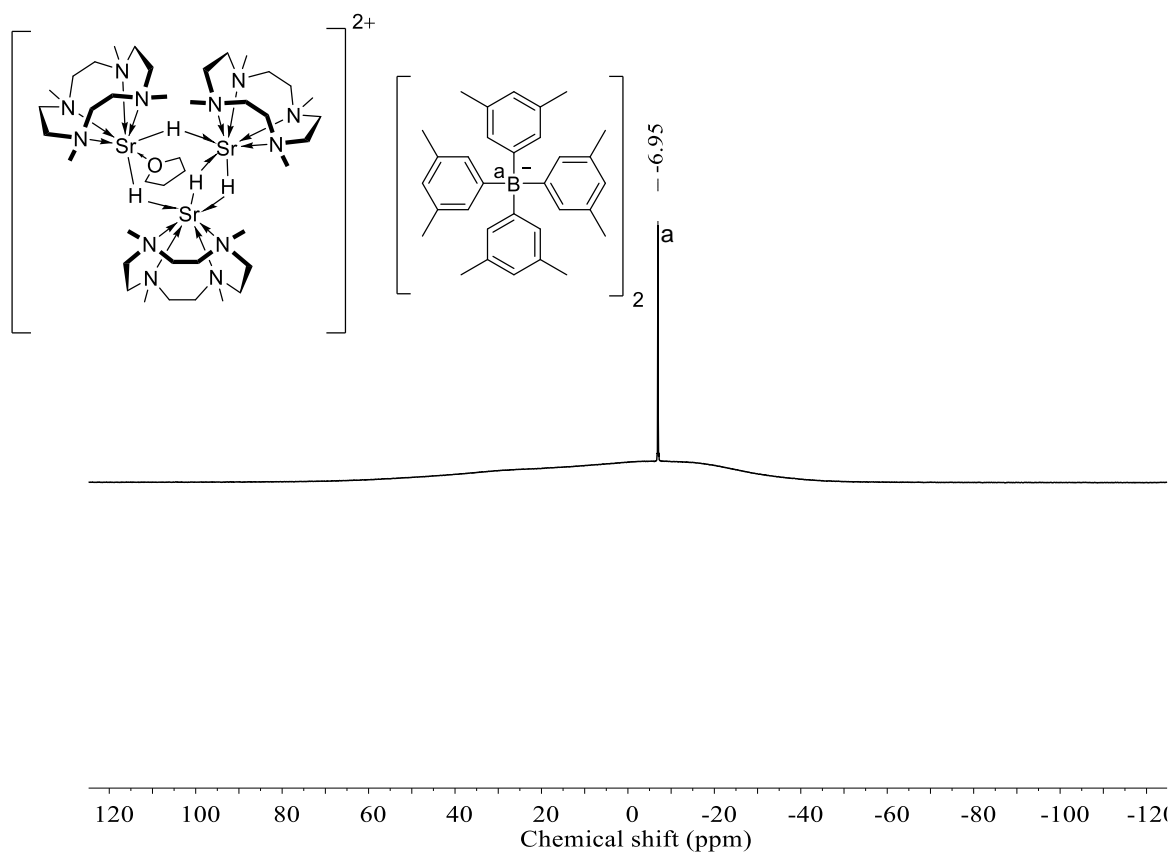

Figure S6:  $^{11}\text{B}\{^1\text{H}\}$  NMR spectrum (128 MHz,  $\text{THF-}d_6$ , 25 °C) of  $[(\text{Me}_4\text{TACD})_3\text{Sr}_3(\mu\text{-H})_4(\text{thf})][\text{B}(\text{C}_6\text{H}_3\text{-}3,5\text{-Me}_2)_4]_2$ .

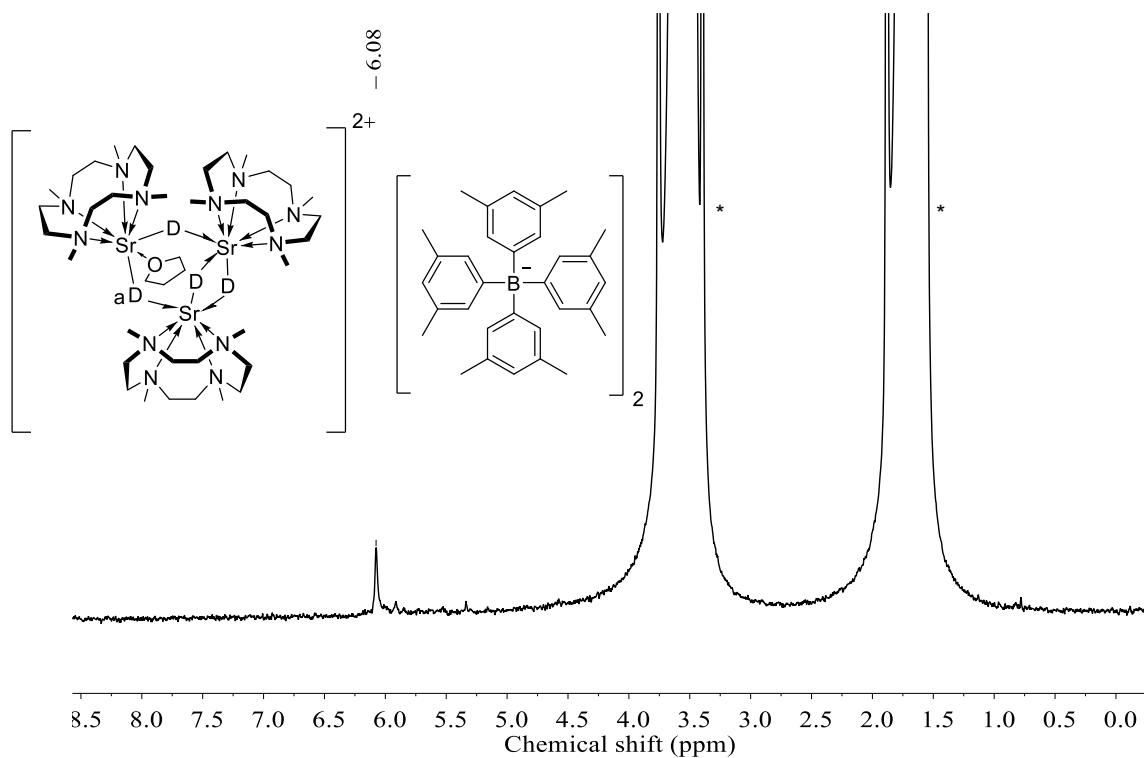

Figure S14:  $^2\text{H}$  NMR spectrum (61 MHz,  $\text{THF-}d_6$ , 25 °C) of  $[(\text{Me}_4\text{TACD})_3\text{Sr}_3(\mu\text{-D})_4(\text{thf})][\text{B}(\text{C}_6\text{H}_3\text{-}3,5\text{-Me}_2)_4]_2$ . (\*) denotes resonances of  $\text{THF-}d_6$ .



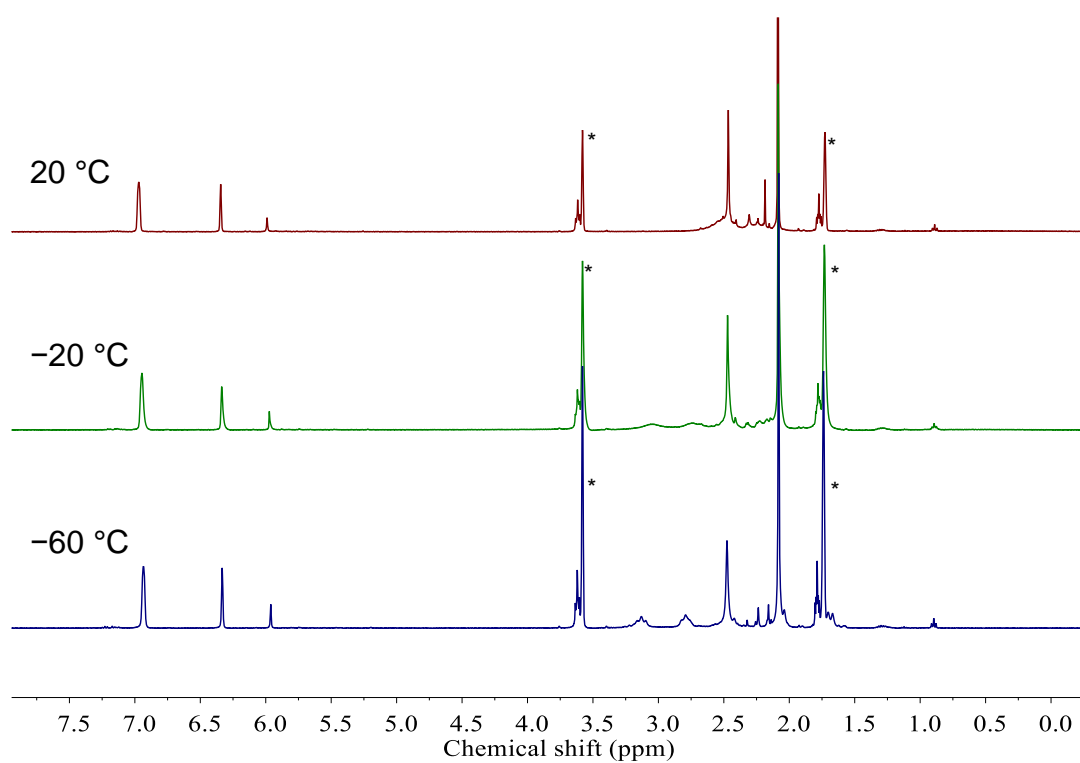

Figure S7: Variable-temperature <sup>1</sup>H NMR spectra of [(Me<sub>4</sub>TACD)<sub>3</sub>Sr<sub>3</sub>(μ-H)<sub>4</sub>(thf)][B(C<sub>6</sub>H<sub>3</sub>-3,5-Me<sub>2</sub>)<sub>4</sub>]<sub>2</sub>. (\*) denotes resonances of THF-*d*<sub>8</sub>.

## 2.11 Molecular Structure of $[(\text{Me}_4\text{TACD})_3\text{Sr}_3(\mu\text{-H})_4(\text{thf})][\text{B}(\text{C}_6\text{H}_3\text{-3,5-Me}_2)_4]_2$ (**4**).

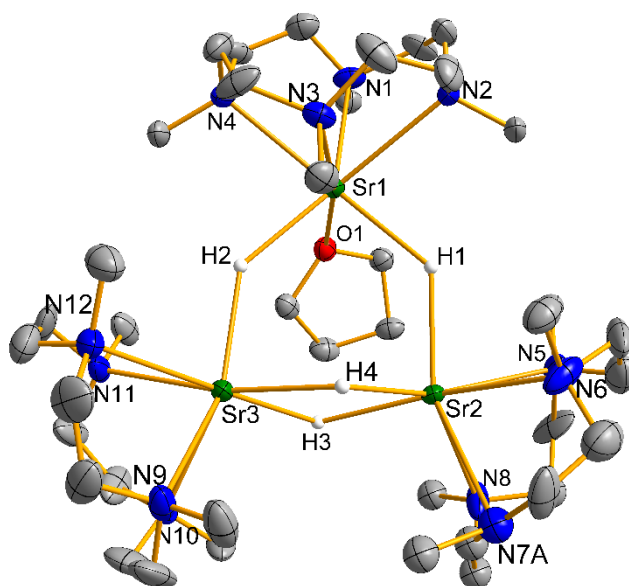

Figure S16: Molecular structure of one of the crystallographically independent molecular cations in the solid state of **4**. Displacement parameters are shown with 30% probability; hydrogen atoms except the hydrides are omitted for clarity. Disordered atoms are only shown with one split position. Selected interatomic distances [ $\text{\AA}$ ]: Sr1 $\cdots$ Sr2 4.4248(6), Sr1 $\cdots$ Sr3 4.5701(6), Sr2 $\cdots$ Sr3 3.9555(6), Sr1–N1 2.851(5), Sr1–N2 2.832(4), Sr1–N3 2.692(5), Sr1–N4 2.773(4), Sr2–N5 2.865(5), Sr2–N6 2.768(6), Sr2–N7A 3.03(2), Sr2–N7B 2.724(9), Sr2–N8 2.819(5), Sr3–N9 2.810(5), Sr3–N10 2.798(5), Sr3–N11 2.825(5), Sr3–N12 2.820(5), Sr1–O1 2.600(4), Sr1–H1 2.427(17), Sr1–H2 2.435(17), Sr2–H1 2.435(17), Sr2–H3 2.438(18), Sr2–H4 2.448(18), Sr3–H2 2.433(16), Sr3–H3 2.435(17), Sr3–H4 2.458(18).

## 2.12 Synthesis of $[(\text{Me}_4\text{TACD})_2\text{CaSr}(\mu\text{-H})_2(\text{thf})][\text{B}(\text{C}_6\text{H}_3\text{-3,5-Me}_2)_4]_2$ (**5**).

A suspension of  $[(\text{Me}_4\text{TACD})\text{Sr}(\text{CH}_2\text{Ph})(\text{thf})][\text{B}(\text{C}_6\text{H}_3\text{-3,5-Me}_2)_4]$  (182 mg, 0.20 mmol) and  $[(\text{Me}_4\text{TACD})\text{Ca}(\text{thf})(\text{CH}_2\text{Ph})][\text{B}(\text{C}_6\text{H}_3\text{-3,5-Me}_2)_4]$  (172 mg, 0.20 mmol) in THF (4 mL) was charged with  $\text{H}_2$  (1 bar) by applying three “freeze-pump-thaw” cycles and stirred for 20 min at room temperature until a clear solution was obtained. Stirring was turned off and colorless crystals precipitated from the reaction mixture within 16 h. The crystals were isolated and washed with n-pentane (3 x 2 mL).  $[(\text{Me}_4\text{TACD})_2\text{CaSr}(\mu\text{-H})_2(\text{thf})][\text{B}(\text{C}_6\text{H}_3\text{-3,5-Me}_2)_4]_2$  was isolated as colorless crystals (260 mg, 0.17 mmol); yield: 85%.

$[(\text{Me}_4\text{TACD})_2\text{CaSr}(\mu\text{-D})_2(\text{thf})][\text{B}(\text{C}_6\text{H}_3\text{-3,5-Me}_2)_4]_2$  (**5-d<sub>2</sub>**) was prepared analogously using  $\text{D}_2$ .

**5** dissociates in solution to give several undefined strontium hydride species as well as  $[(\text{Me}_4\text{TACD})_2\text{Ca}_2(\mu\text{-H})_2][\text{B}(\text{C}_6\text{H}_3\text{-3,5-Me}_2)_4]_2$  and  $[(\text{Me}_4\text{TACD})\text{Ca}_2(\mu\text{-H})_3][\text{B}(\text{C}_6\text{H}_3\text{-3,5-Me}_2)_4]$  in addition to **5**. The NMR spectroscopic data assigned to **5** are given below.

$^1\text{H}$  NMR (400 MHz,  $\text{THF-}d_8$ , 25 °C):  $\delta$  = 1.74 – 1.80 (m, 8H, THF), 2.14 – 2.31 (br. s, 16H,  $\text{NCH}_2$ ), 2.09 (s, 48H,  $\text{Ar}(\text{CH}_3)_2$ ), 2.29 (s, 12H,  $\text{NCH}_3$ ), 2.35 (s, 12H,  $\text{NCH}_3$ ), 2.41 – 2.62 (br. s, 16H,  $\text{NCH}_2$ ), 3.59 – 3.63 (m, 8H, THF), 5.10 (s, 2H,  $\text{CaSr-H}$ ), 6.34 – 6.38 (m, 8H, *para*- $\text{C}_6\text{H}_3$ ), 6.95 – 6.99 (m, 16H, *ortho*- $\text{C}_6\text{H}_3$ ) ppm.

$^2\text{H}$  NMR (61 MHz,  $\text{THF-}d_8$ , 25 °C):  $\delta$  = 5.18 ppm.

$^{13}\text{C}\{^1\text{H}\}$  NMR (101 MHz,  $\text{THF-}d_8$ , 25 °C):  $\delta$  = 22.5 (s,  $\text{Ar}(\text{CH}_3)_2$ ), 26.6 (s, THF), 44.6 ( $\text{NCH}_3$ ), 44.6 ( $\text{NCH}_3$ ), 53.9 (br. s,  $\text{NCH}_2$ ), 54.4 (br. s,  $\text{NCH}_2$ ), 68.4 (s, THF), 123.7 (s, *para*- $\text{C}_6\text{H}_3$ ), 133.0 (q,  $^3J_{\text{BC}} = 2.7$  Hz, *meta*- $\text{C}_6\text{H}_3$ ), 135.7 (*ortho*- $\text{C}_6\text{H}_3$ ), 165.8 (q,  $^1J_{\text{BC}} = 49.3$  Hz, *ipso*- $\text{C}_6\text{H}_3$ ) ppm.

$^{11}\text{B}\{^1\text{H}\}$  NMR (128 MHz,  $\text{THF-}d_8$ , 25 °C):  $\delta$  = -6.96 ppm.

Anal. Calc. for  $\text{C}_{92}\text{H}_{138}\text{B}_2\text{CaN}_8\text{OSr}$  (1521.49 g mol<sup>-1</sup>): C, 72.63; H, 9.14; N, 7.36. Found: C, 71.09; H, 9.09; N, 7.04 %.

## 2.13 NMR spectra of $[(\text{Me}_4\text{TACD})_2\text{CaSr}(\mu\text{-H})_2(\text{thf})][\text{B}(\text{C}_6\text{H}_3\text{-3,5-Me}_2)_4]_2$ (**5**)

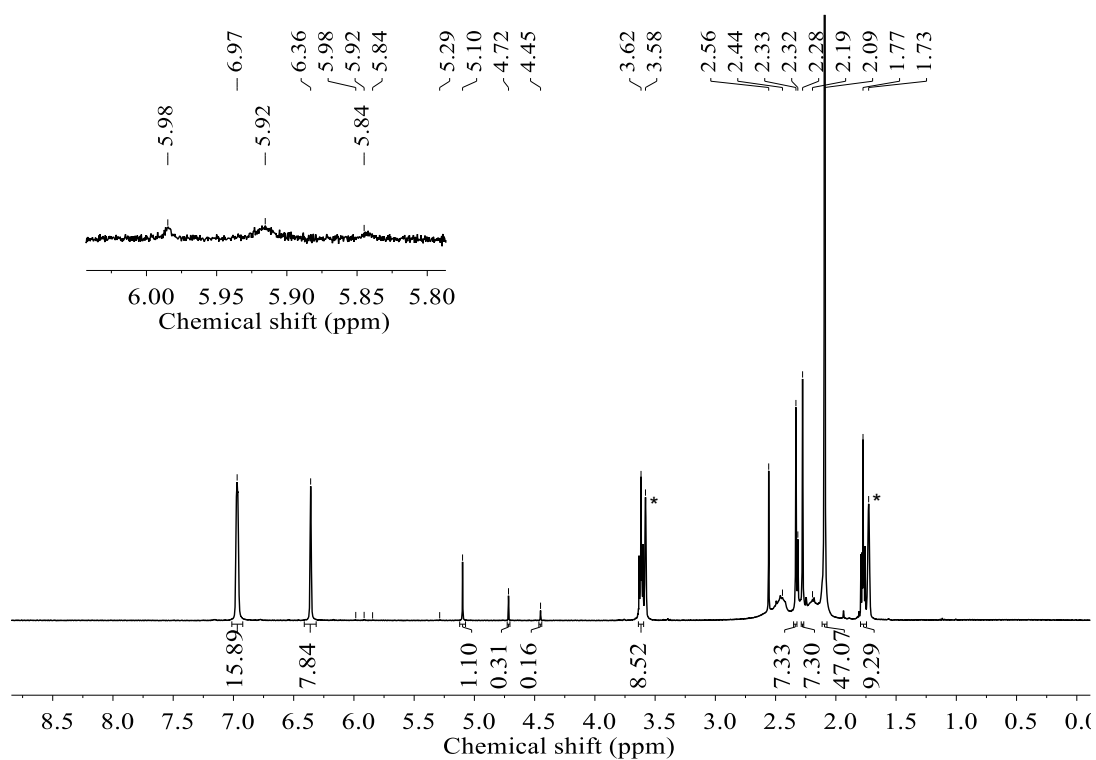

Figure S8:  $^1\text{H}$  NMR spectrum (400 MHz,  $\text{THF-}d_8$ , 25 °C) of  $[(\text{Me}_4\text{TACD})_2\text{CaSr}(\mu\text{-H})_2(\text{thf})][\text{B}(\text{C}_6\text{H}_3\text{-3,5-Me}_2)_4]_2$ . (\*) denotes residual proton resonances of  $\text{THF-}d_8$ .

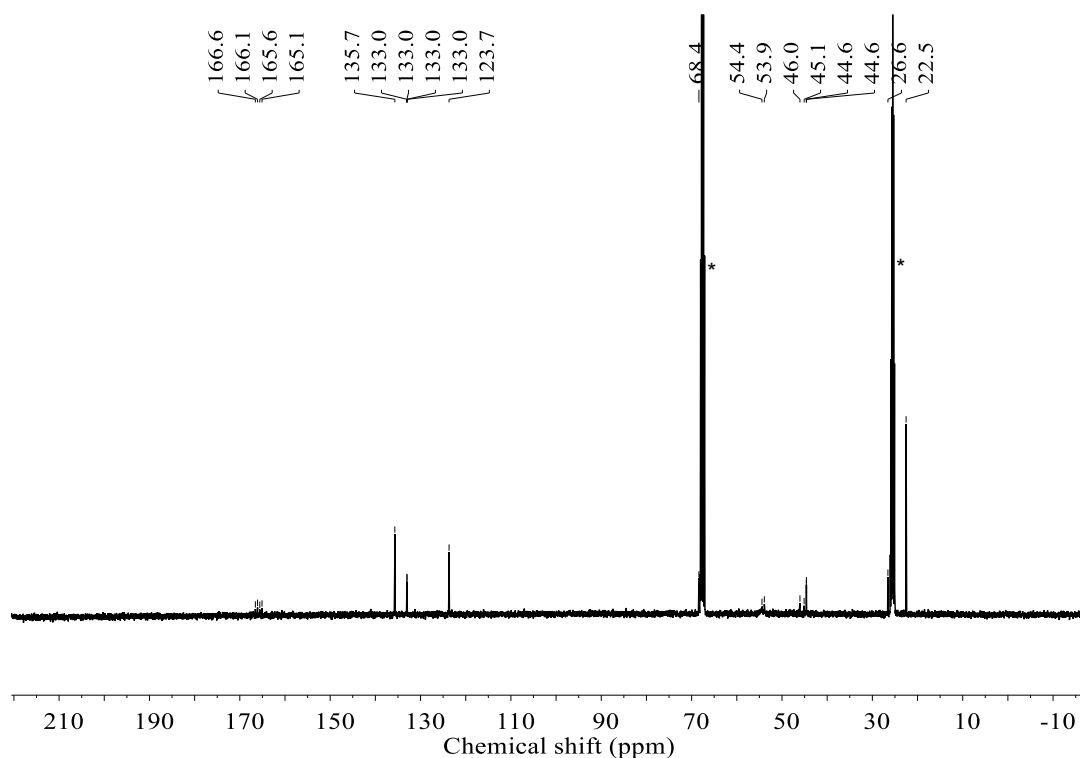

Figure S9:  $^{13}\text{C}\{^1\text{H}\}$  NMR spectrum (101 MHz,  $\text{THF-}d_8$ , 25 °C) of  $[(\text{Me}_4\text{TACD})_2\text{CaSr}(\mu\text{-H})_2(\text{thf})][\text{B}(\text{C}_6\text{H}_3\text{-3,5-Me}_2)_4]_2$ . (\*) denotes carbon resonances of  $\text{THF-}d_8$ .

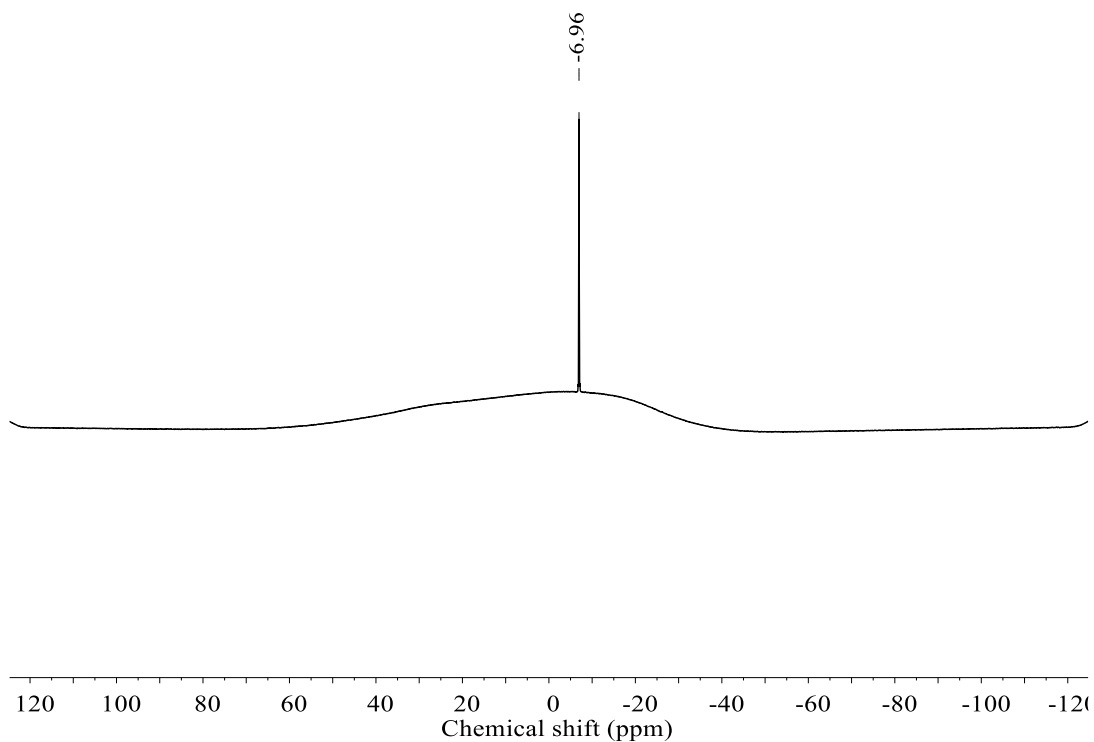

Figure S10:  $^{11}\text{B}\{^1\text{H}\}$  NMR spectrum (128 MHz,  $\text{THF-}d_8$ , 25 °C) of  $[(\text{Me}_4\text{TACD})_2\text{CaSr}(\mu\text{-H})_2(\text{thf})][\text{B}(\text{C}_6\text{H}_3\text{-}3,5\text{-Me}_2)_4]_2$ .

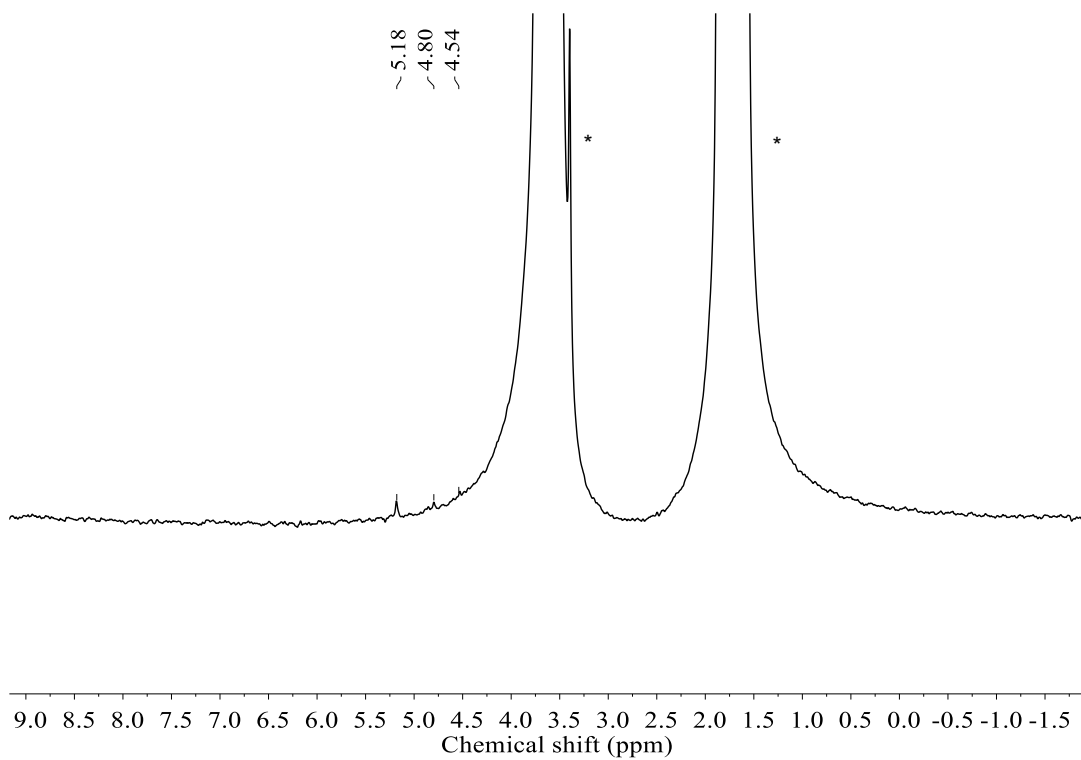

Figure S11:  $^2\text{H}$  NMR spectrum (61 MHz,  $\text{THF-}d_8$ , 25 °C) of  $[(\text{Me}_4\text{TACD})_2\text{CaSr}(\mu\text{-D})_2(\text{thf})][\text{B}(\text{C}_6\text{H}_3\text{-}3,5\text{-Me}_2)_4]_2$ . (\*) denotes resonances of  $\text{THF-}d_8$ .

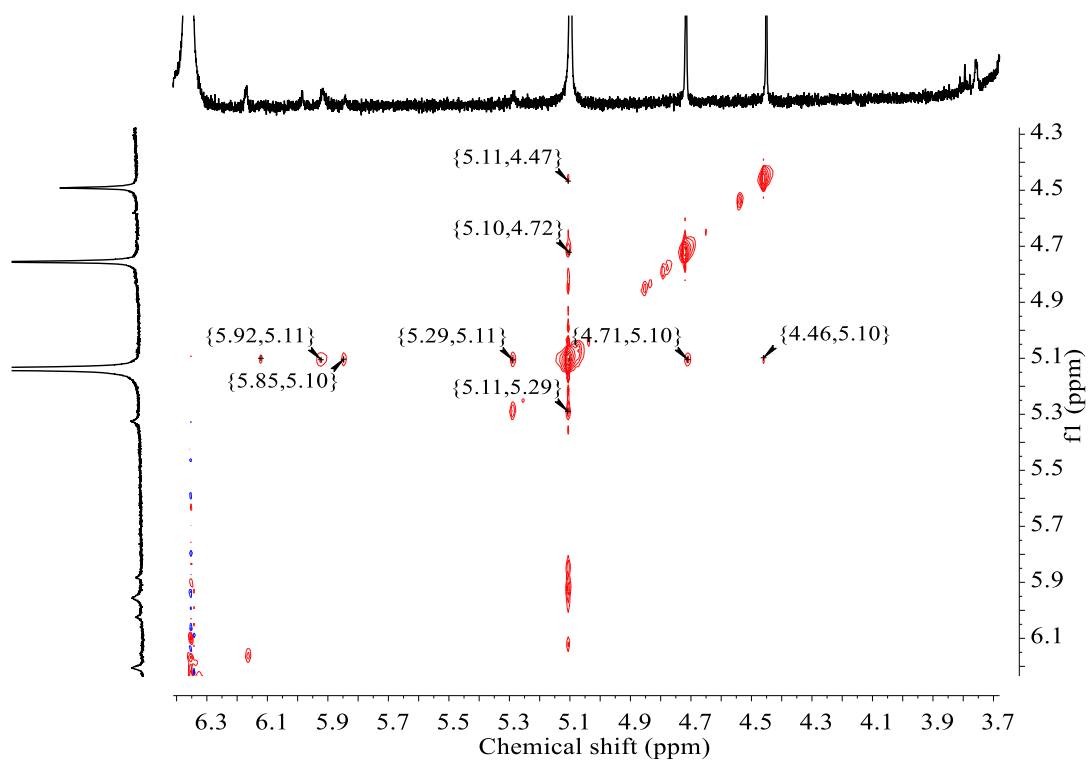

Figure S12: Cutout of the hydride region of the  $^1\text{H}$ - $^1\text{H}$  EXSY NMR spectrum (400 MHz,  $\text{THF-}d_6$ , 25  $^\circ\text{C}$ ) of  $[(\text{Me}_4\text{TACD})_2\text{CaSr}(\mu\text{-H})_2(\text{thf})][\text{B}(\text{C}_6\text{H}_3\text{-3,5-Me}_2)_4]_2$ .

## 2.14 Molecular Structure of $[(\text{Me}_4\text{TACD})_2\text{CaSr}(\mu\text{-H})_2(\text{thf})][\text{B}(\text{C}_6\text{H}_3\text{-3,5-Me}_2)_4]_2$ (**5**).

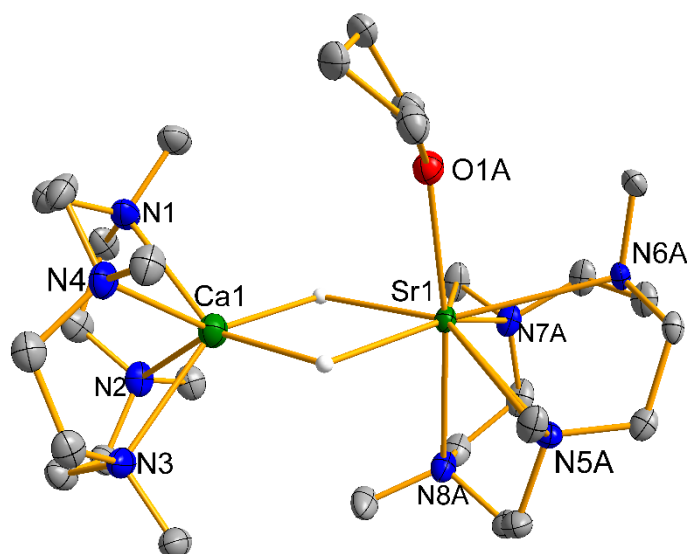

Figure S13: Molecular structure of the molecular dication of **5** in the solid state. Displacement parameters are shown with 30% probability; hydrogen atoms except of the hydride ligands are omitted for clarity. Disordered atoms are only shown with one split position. The atoms of the coordinated and disordered thf ligand are only shown with one split position. Selected interatomic distances [Å]: Ca1... Sr1/Ca2 3.7095(5), Ca1–N1 2.545(2), Ca1–N2 2.590(2), Ca1–N3 2.545(2), Ca1–N4 2.548(2), Sr1/Ca2–O1A 2.491(9), Sr1/Ca2–N5A 2.666(4), Sr1/Ca2–N6A 2.823(6), Sr1/Ca2–N7A 2.666(3), Sr1/Ca2–N8A 2.704(3), Ca1–H1 2.22(3), Ca1–H2 2.24(3), Sr1/Ca2–H1 2.40(3), Sr1/Ca2–H2 2.42(3).

### 3 Reactivity Studies

#### 3.1 Reaction of **1a** with H<sub>2</sub> (1 bar).

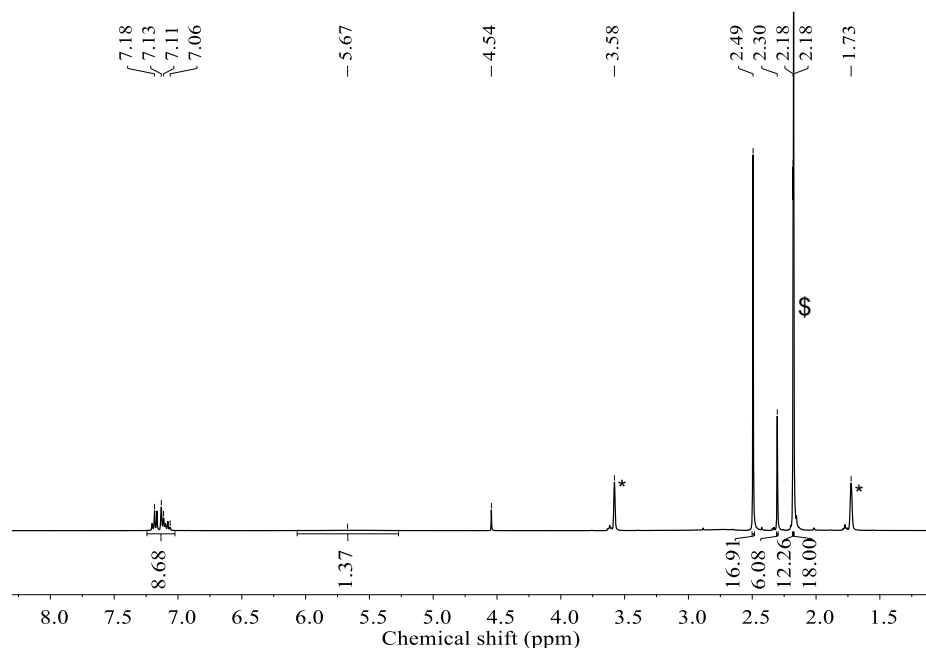

Figure S14: *In-situ* NMR spectrum of the reaction of **1a** with H<sub>2</sub> (1 bar) after 30 min in THF-*d*<sub>8</sub> (\*) with hexamethylbenzene (\$) as internal standard.

#### 3.2 Variation of stoichiometry in strontium hydride synthesis.

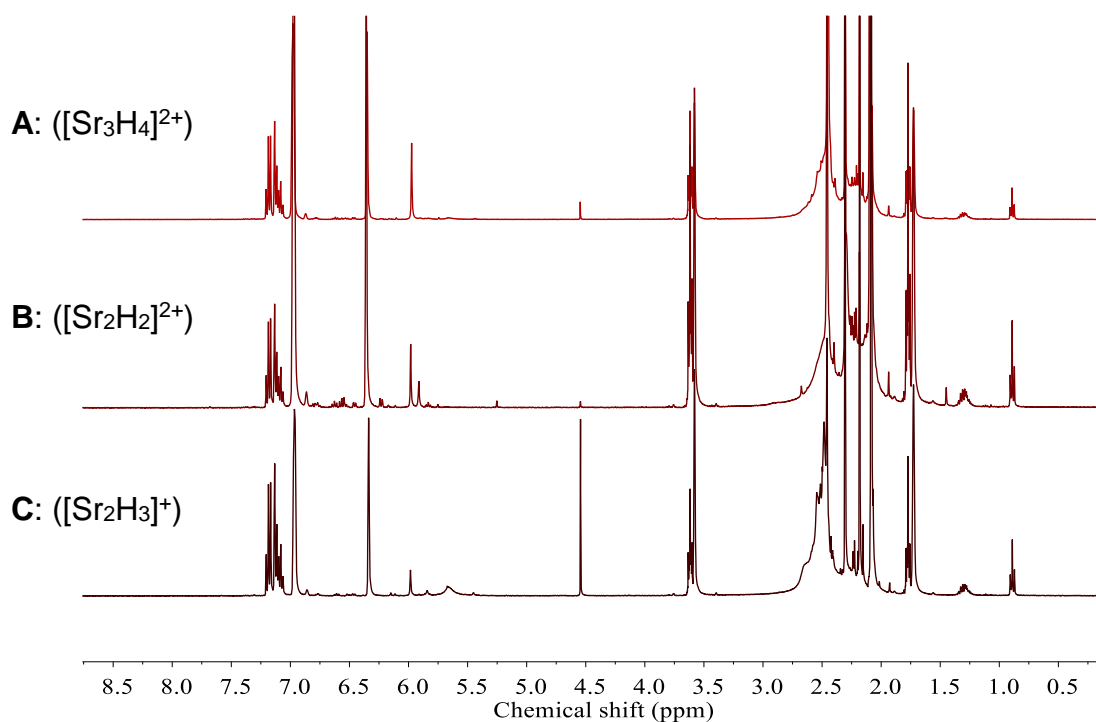

Figure S15: *In-situ* NMR spectra after addition of H<sub>2</sub> (1 bar) to a mixture of **1a** and **2** in varied stoichiometry in THF-*d*<sub>8</sub>. The formula in parenthesis corresponds to the expected hydride species for each case. **A:** **1a** in the presence of two equivalents of **2**. **B:** Pure **2**. **C:** **1a** in the presence of one equivalent of **2**. Hydride species **4** is formed in all three cases, but **B** and **C** show several additional hydride peaks.



### 3.3 Reaction of **4** with **3**.

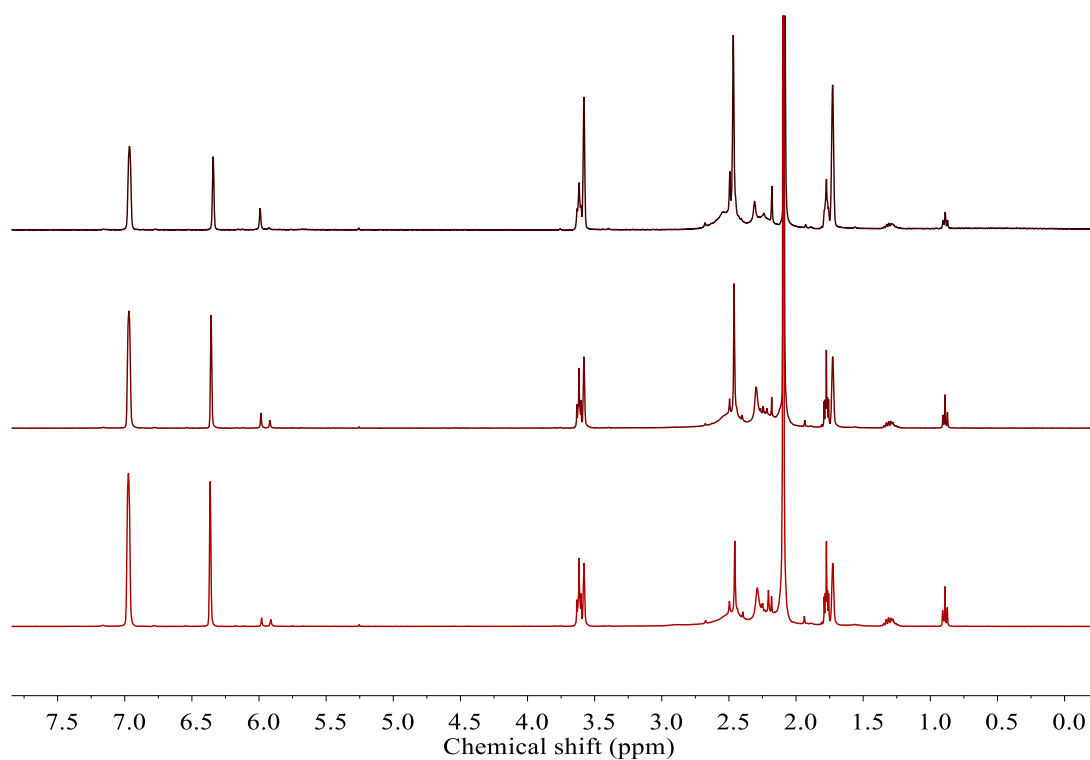

Figure S16: <sup>1</sup>H NMR spectra of the reaction of strontium hydride **4** with strontium bis(borate) **3** in THF-*d*<sub>8</sub>. Top: Pure **4**. Middle: After addition of one equivalent of **3**. Bottom: After addition of two equivalents of **3**. Upon addition of **3**, a second major hydride species at  $\delta = 5.92$  ppm is observed.

### 3.4 Reaction of **4** with [NEt<sub>3</sub>H][B(C<sub>6</sub>H<sub>3</sub>-3,5-Me<sub>2</sub>)<sub>4</sub>].

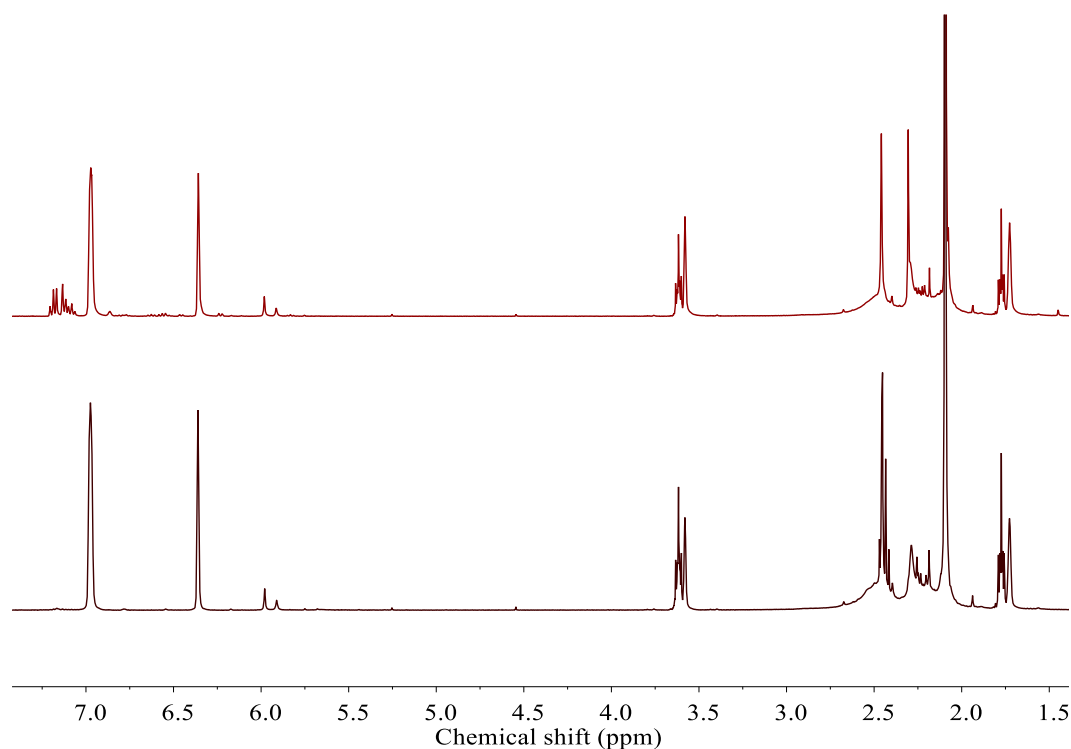

Figure S17: Comparison of the *in-situ* NMR spectra of the reactions of **2** with H<sub>2</sub> (1 bar) (top) and of **4** with one equivalent of [NEt<sub>3</sub>H][B(C<sub>6</sub>H<sub>3</sub>-3,5-Me<sub>2</sub>)<sub>4</sub>] (bottom) in THF-*d*<sub>8</sub>. The same equilibrium mixture is obtained in both cases.

### 3.5 Reaction of **4** with D<sub>2</sub>.

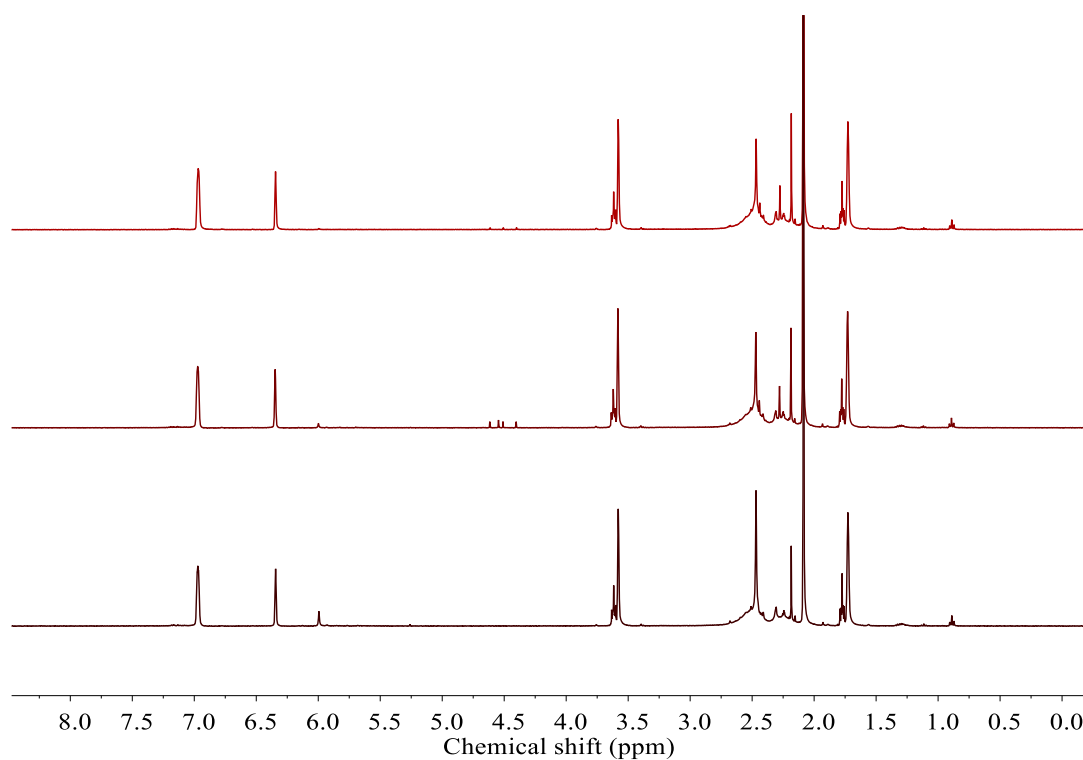

Figure S27: NMR spectra of the reaction of **4** with D<sub>2</sub> (1 bar) in THF-*d*<sub>8</sub>. Bottom: Before addition of D<sub>2</sub>. Middle: 5 min after addition of D<sub>2</sub>. Top: 30 min after addition of D<sub>2</sub>.

### 3.6 Comparison of <sup>1</sup>H NMR spectrum of hydrogenolysis reaction mixtures of **2** + **2-Ca** and **1a** + **3-Ca** with that of isolated **5**

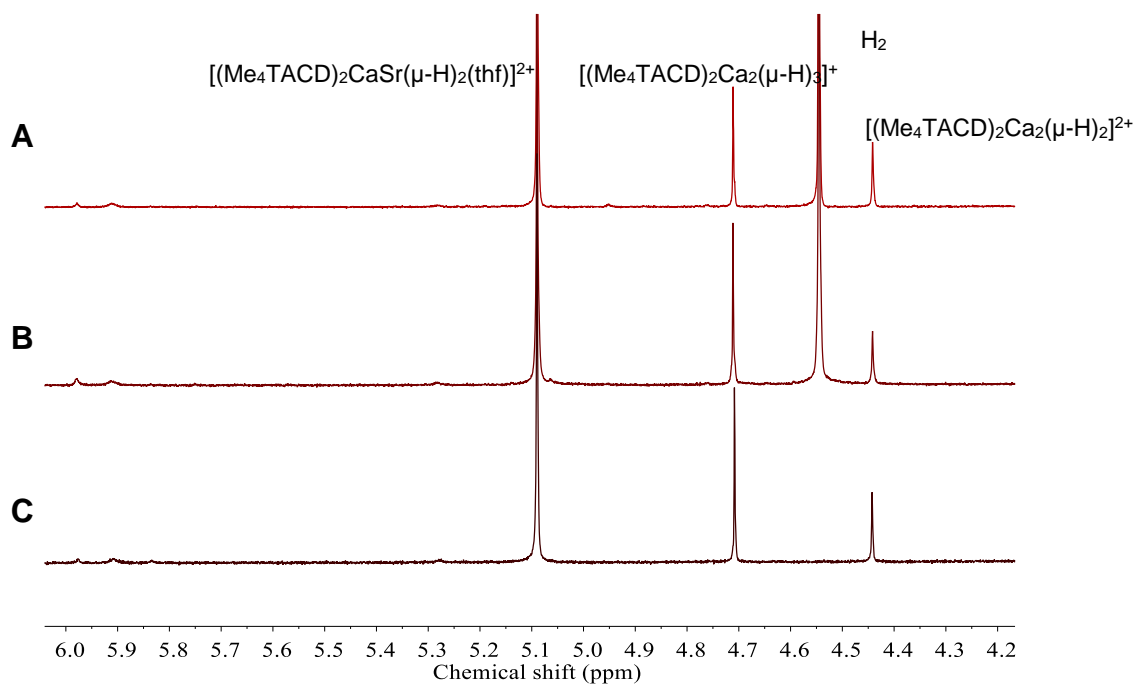

Figure S18: Cut-out of the hydride region of the *in-situ* <sup>1</sup>H NMR spectra of the hydrogenolysis of **2** in presence of **2-Ca** (A), **1a** in the presence of **3-Ca** (B) and isolated **5** (C) in THF-*d*<sub>8</sub>. The same equilibrium mixture is obtained in all three cases.

### 3.7 Reaction of **5** with **3-Ca**.

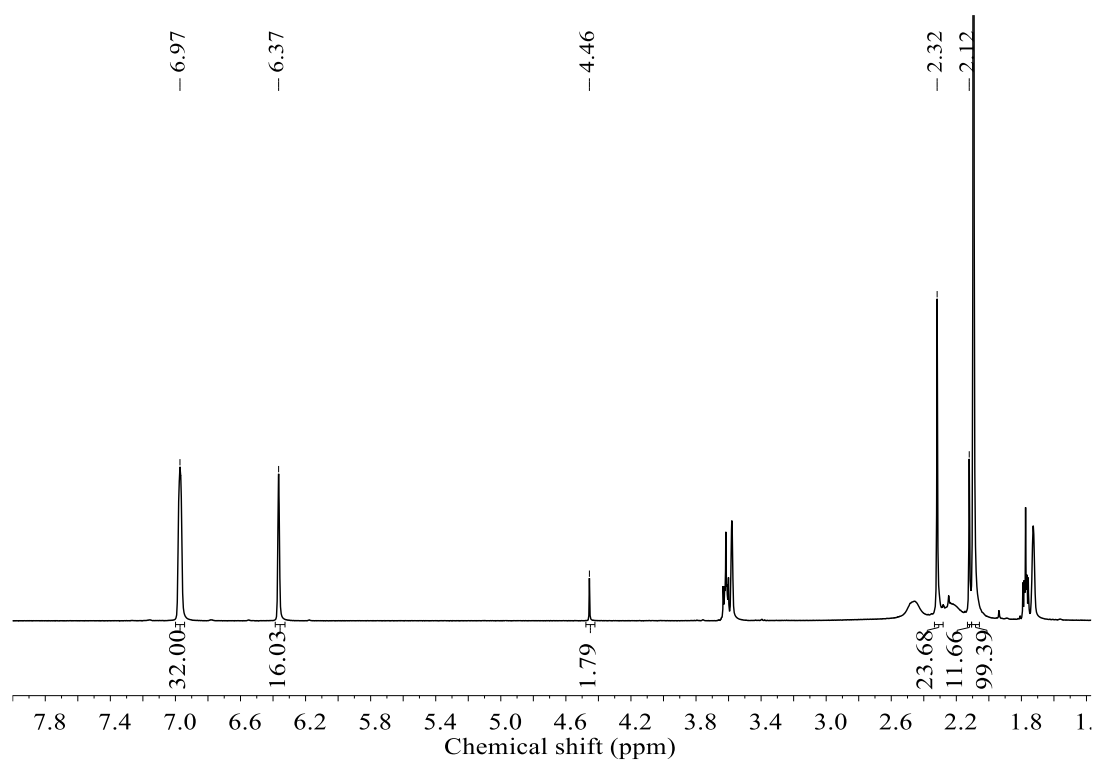

Figure S19: *In-situ*  $^1\text{H}$  NMR spectrum of the reaction of **5** with **3-Ca** in  $\text{THF-}d_8$ . Clean formation of  $[(\text{Me}_4\text{TACD})_2\text{Ca}_2(\mu\text{-H})_2][\text{B}(\text{C}_6\text{H}_3\text{-}3,5\text{-Me}_2)_4]_2$  and **3** is observed.

### 3.8 Reaction of **5** with two equivalents of **3**.

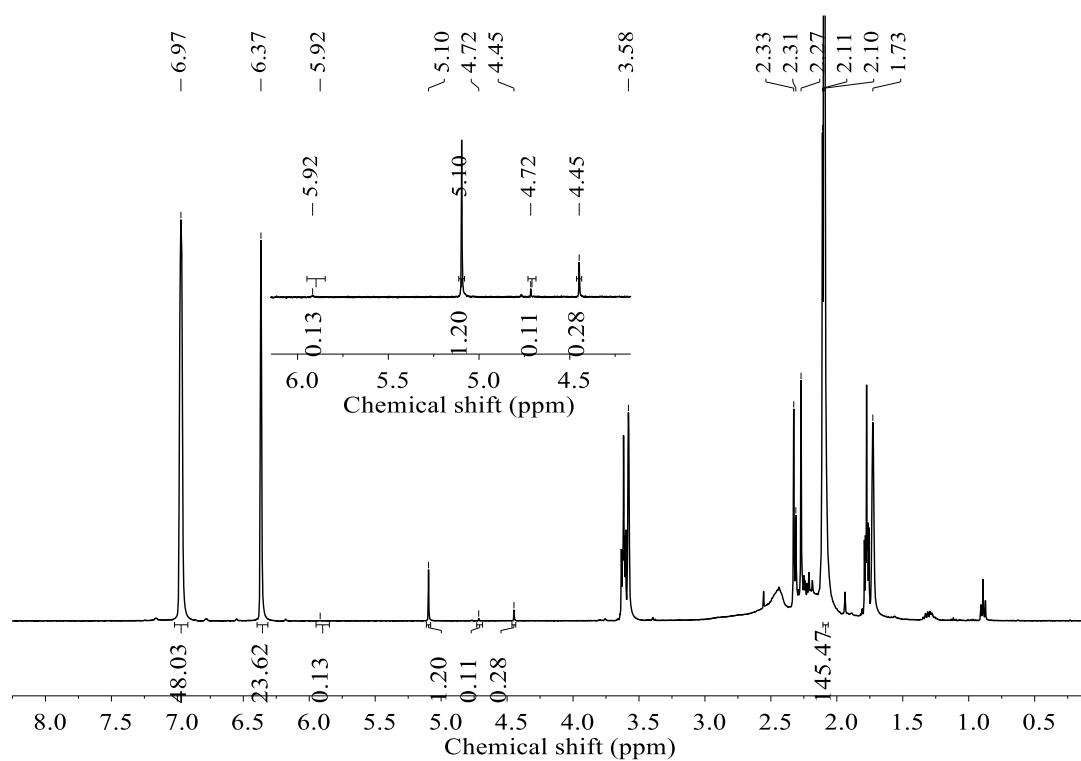

Figure S20: *In-situ*  $^1\text{H}$  NMR spectrum of the reaction of **5** with two equivalents of **3** in  $\text{THF-}d_8$ . The main hydride resonance belongs to **5** and resonances of  $[(\text{Me}_4\text{TACD})_2\text{Ca}_2(\mu\text{-H})_2][\text{B}(\text{C}_6\text{H}_3\text{-}3,5\text{-Me}_2)_4]_2$  and  $[(\text{Me}_4\text{TACD})_2\text{Ca}_2(\mu\text{-H})_3][\text{B}(\text{C}_6\text{H}_3\text{-}3,5\text{-Me}_2)_4]$  are still observed.

### 3.9 Catalysis

For catalytic experiments, a stock solution with a total volume of 1 mL containing the substrate (1.00 mmol) and the internal standard 1,4-(SiMe<sub>3</sub>)C<sub>6</sub>H<sub>4</sub> (55 mg, 0.25 mmol) in THF-*d*<sub>8</sub> was prepared. For each experiment, the catalyst was dissolved in 0.5 mL of THF-*d*<sub>8</sub> and 0.1 mL of the stock solution were added. The mixture was charged with H<sub>2</sub> (1 bar) by applying three “freeze-pump-thaw” cycles and heated to 60 °C for the time indicated in Table S1. Reaction progress was monitored by <sup>1</sup>H NMR spectroscopic analysis.

Table S1: Catalytic hydrogenation of 1-octene with molecular alkaline earth metal hydrides.

| Entry              | Substrate                                                                           | Catalyst (mol%) <sup>[a]</sup>                                              | t [h] | Product                                                                               | %<br>Conv.        |
|--------------------|-------------------------------------------------------------------------------------|-----------------------------------------------------------------------------|-------|---------------------------------------------------------------------------------------|-------------------|
| 1                  | 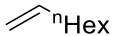   | <b>4</b> (3.3)                                                              | 12    |    | 93 <sup>[b]</sup> |
| 2                  |    | <b>2</b> (10)                                                               | 12    |    | 91                |
| 3                  |    | <b>5</b> (5)                                                                | 24    |    | 95                |
| 4 <sup>[c]</sup>   |    | $[(\text{Me}_4\text{TACD})_2\text{Ca}_2(\mu\text{-H})_2]^{2+}$ ( <b>5</b> ) | 24    |    | 95 <sup>[b]</sup> |
| 5                  |   | <b>4</b> (3.3)                                                              | 12    |   | 99                |
| 6                  |  | <b>5</b> (5)                                                                | 24    |  | 99                |
| 7                  |  | <b>4</b> (3.3)                                                              | 95    |  | 20                |
| 8                  |  | <b>5</b> (5)                                                                | 95    |  | 0                 |
| 9 <sup>[c,d]</sup> |  | $[(\text{Me}_4\text{TACD})_2\text{Ca}_2(\mu\text{-H})_2]^{2+}$ ( <b>5</b> ) | 24    |  | 0                 |

[a] equivalent to 10 mol% monomeric AE hydride, [b] 5 % 2-octene, [c] Data taken from [S4], [d] 80 °C.

## 4 Crystal Structure Determinations

X-ray diffraction data were collected at 100 K on an Eulerian 4-circle diffractometer STOE STADIVARI in  $\omega$ -scan mode with Cu-K $\alpha$  radiation. The structures were solved by direct methods using SHELXT.<sup>[S6]</sup> All refinements were carried out against  $F^2$  with ShelXL<sup>[S7]</sup> as implemented in the program system Olex2.<sup>[S8]</sup> In the crystal structure of **1**, the CH<sub>2</sub> units of the Me<sub>4</sub>TACD ligand C1 – C8 are disordered as well as atom C29 of the coordinated THF ring ligand is disordered. The disorder could be resolved with split positions. Restraints were used in the refinement of the anisotropic displacement parameters of the disordered atoms. All hydrogen atoms in **1** were refined in their position. Diffraction data received from a crystal of dimension 0.15 x 0.25 x 0.43 were obtained for **2a** leading to unit cell parameters  $a = 12.4069(3) \text{ \AA}$ ,  $b = 13.016(9) \text{ \AA}$ ,  $c = 19.7043(4) \text{ \AA}$ ,  $\alpha = 76.2476(16)^\circ$ ,  $\beta = 86.8441(17)^\circ$ ,  $\gamma = 86.8028(16)^\circ$ ,  $V = 3086.01(12)^\circ$ . Structure solution and refinement in the tentative triclinic space group  $P\bar{1}$  showed the molecular connectivity of the molecular cation C<sub>19</sub>H<sub>35</sub>N<sub>4</sub>Sr, the molecular anion C<sub>32</sub>H<sub>36</sub>B as well as three thf molecules C<sub>5</sub>H<sub>10</sub>O. Due to unsatisfactory refinement data, we do not further discuss this structure. Compound **4** was found with two crystallographically independent molecular cations and four corresponding independent molecular anions, as well as five non-coordinated THF molecules. Both crystallographically independent molecular cations have very similar geometrical parameters. In the refinement, the solvent molecules were "squeezed out" with the BYPASS algorithm<sup>[S9]</sup> as implemented in PLATON.<sup>[S10]</sup> The solvent region adds up to a total volume of 1571  $\text{\AA}^3$  per unit cell and contains 417 electrons. 10 well-ordered THF would require 1040  $\text{\AA}^3$ ;<sup>[S11]</sup> but disordered molecules are usually less close-packed. These ten THF molecules should contribute 400 electrons. Both criteria suggest an acceptable match. Due to disorder, the Me<sub>4</sub>TACD ligands were partly refined with split positions (involving atoms N7, C17, C18, C19, C23 and C24). The solution and initial refinement showed residual electron densities close to the bridging sites. The reaction conditions and the resulting geometry of these secondary sites suggest the presence of trace amounts of iodine. A structure featuring iodide ligands bridging Sr cations has been described by Fromm et al.<sup>[S12]</sup> To deconvolute site occupancy and isotropic displacement parameter, we defined a common displacement parameter for all hydride ligands and the iodide minority sites, and we constrained the sum of the occupancies for mutually exclusive iodide and hydride sites to unity. The trace amount of iodine suggested by the new structure model refined to 4% for the site associated with the highest and 3% for that with the second local density maximum. All non-hydrogen atoms were refined with anisotropic displacement parameters. The disordered atom positions of one coordinated THF ligand in the structure of **4** were refined with isotropic displacement parameters because attempted refinement with anisotropic parameters did not give physically meaningful values. The refinement of the

disordered groups in the structure of this molecule included distance restraints (using the commands SADI and DFIX as implied in ShelXL). In addition, a general RIGU command was employed. All hydrogen atom positions in **4** were included in calculated positions except for the hydride atoms H1 – H4 as well as H5 – H8 within the molecular cation fragment  $[\text{Sr}_3\text{H}_4]^{2+}$ . Compound **5** is found with two co-crystallized, non-coordinated THF molecules. One of these is located around a center of inversion, leading to disorder around Wyckoff position 2c (involving atoms O4 and C101 – 104). We have refined the occupancies of the metal atoms. Our final refinement gave occupancy factors of 0.743(2) (Sr1) and 0.257(2) (Ca2) with both atoms constrained at the same position and with the same anisotropic displacement parameters. We are aware that the resulting composition does not necessarily apply to the bulk average of the crystals. In addition, the atoms of the ring ligand Me<sub>4</sub>TACD (N5 – N8, C13 – C24) and of the coordinated thf ligand O1 and C13 – C16 were refined with split positions. The non-hydrogen atoms on split positions N5 – N8 and C13 – C24 were refined with isotropic displacement parameters. However, the final refinement of the second metal atom position was carried out with 100% multiplicity for calcium, as the refinement of the occupation factor led to a value close to 1. All hydrogen atoms were included in calculated positions and treated as riding throughout the refinement, except of the hydride atoms H1 and H2 which were refined in their position. The position of the hydride atom H4 in one of these clusters was located in a Difference Fourier synthesis and fixed in its position. Refinement results are given in Table S2. Graphical representations were performed with the program DIAMOND.<sup>[S13]</sup> CCDC-2078067 (**1**), CCDC-2078068 (**2a**), CCDC-2078069(**4**) and CCDC-2078070 (**5**) contain the supplementary crystallographic data for this paper. These data can be obtained free of charge from the Crystallographic Data Centre via [www.ccdc.cam.ac.uk/data\\_request/cif](http://www.ccdc.cam.ac.uk/data_request/cif).

Table S2: Crystallographic data of **1**, **4** and **5**.

|                                                                                  | <b>1</b>                                                          | <b>4</b>                                                                                                                                                               | <b>5</b>                                                                                                                                                               |
|----------------------------------------------------------------------------------|-------------------------------------------------------------------|------------------------------------------------------------------------------------------------------------------------------------------------------------------------|------------------------------------------------------------------------------------------------------------------------------------------------------------------------|
| Formula                                                                          | C <sub>30</sub> H <sub>50</sub> N <sub>4</sub> OSr                | 2(C <sub>40</sub> H <sub>95.97</sub> I <sub>0.03</sub> N <sub>12</sub> OSr <sub>3</sub> ),<br>4(C <sub>32</sub> H <sub>36</sub> B), 5(C <sub>4</sub> H <sub>8</sub> O) | 2(C <sub>28</sub> H <sub>66</sub> Ca <sub>1.23</sub> N <sub>8</sub> OSr <sub>0.77</sub> ),<br>4(C <sub>32</sub> H <sub>36</sub> B), 5(C <sub>4</sub> H <sub>8</sub> O) |
| <i>F</i> <sub>w</sub> /g·mol <sup>-1</sup>                                       | 570.36                                                            | 4134.28                                                                                                                                                                | 3378.87                                                                                                                                                                |
| cryst. color,<br>habit                                                           | yellow rod                                                        | colorless block                                                                                                                                                        | colorless rod                                                                                                                                                          |
| crystal size /<br>mm                                                             | 0.06 x 0.15 x 0.30                                                | 0.08 x 0.10 x 0.15                                                                                                                                                     | 0.06 x 0.21 x 0.43                                                                                                                                                     |
| crystal system                                                                   | triclinic                                                         | triclinic                                                                                                                                                              | monoclinic                                                                                                                                                             |
| space group                                                                      | <i>P</i> $\bar{1}$                                                | <i>P</i> $\bar{1}$                                                                                                                                                     | <i>P</i> 2 <sub>1</sub> / <i>c</i>                                                                                                                                     |
| <i>a</i> / Å                                                                     | 8.8102(18)                                                        | 17.2794(2)                                                                                                                                                             | 22.3924(3)                                                                                                                                                             |
| <i>b</i> / Å                                                                     | 9.0828(18)                                                        | 24.7939(4)                                                                                                                                                             | 12.75071(15)                                                                                                                                                           |
| <i>c</i> / Å                                                                     | 19.687(4)                                                         | 28.3335(5)                                                                                                                                                             | 35.5684(4)                                                                                                                                                             |
| $\alpha$ / °                                                                     | 88.58(3)                                                          | 109.8730(12)                                                                                                                                                           |                                                                                                                                                                        |
| $\beta$ / °                                                                      | 87.44(3)                                                          | 90.2679(12)                                                                                                                                                            | 101.7303(9)                                                                                                                                                            |
| $\gamma$ / °                                                                     | 70.78(3)                                                          | 90.7112(12)                                                                                                                                                            |                                                                                                                                                                        |
| <i>V</i> / Å <sup>3</sup>                                                        | 1486.0(6)                                                         | 11414.5(3)                                                                                                                                                             | 9943.4(2)                                                                                                                                                              |
| <i>Z</i>                                                                         | 2                                                                 | 2                                                                                                                                                                      | 2                                                                                                                                                                      |
| <i>d</i> <sub>calc</sub> /Mg·m <sup>-3</sup>                                     | 1.275                                                             | 1.206                                                                                                                                                                  | 1.129                                                                                                                                                                  |
| $\mu$ (CuK $\alpha$ )/mm <sup>-1</sup>                                           | 2.722                                                             | 2.285                                                                                                                                                                  | 1.593                                                                                                                                                                  |
| <i>F</i> (000)                                                                   | 608                                                               | 4439                                                                                                                                                                   | 3669                                                                                                                                                                   |
| $\theta$ range / °                                                               | 2.25, 71.28                                                       | 2.56, 72.04                                                                                                                                                            | 4.31, 71.82                                                                                                                                                            |
| index ranges                                                                     | -9 ≤ <i>h</i> ≤ 10,<br>-11 ≤ <i>k</i> ≤ 9,<br>-23 ≤ <i>l</i> ≤ 24 | -21 ≤ <i>h</i> ≤ 21,<br>-30 ≤ <i>k</i> ≤ 30,<br>-34 ≤ <i>l</i> ≤ 25                                                                                                    | -27 ≤ <i>h</i> ≤ 27,<br>-15 ≤ <i>k</i> ≤ 15,<br>-42 ≤ <i>l</i> ≤ 24                                                                                                    |
| refln.                                                                           | 16035                                                             | 100682                                                                                                                                                                 | 65203                                                                                                                                                                  |
| independ.<br>reflns ( <i>R</i> <sub>int</sub> )                                  | 5489 (0.0265)                                                     | 42045 (0.0311)                                                                                                                                                         | 18680 (0.0581)                                                                                                                                                         |
| observed<br>reflns                                                               | 5064                                                              | 31137                                                                                                                                                                  | 11925                                                                                                                                                                  |
| data/ restr./<br>param.                                                          | 5489/ 176 / 339                                                   | 42045/ 2321/ 2268                                                                                                                                                      | 18680/ 1060/ 1181                                                                                                                                                      |
| <i>R</i> <sub>1</sub> , <i>wR</i> <sub>2</sub> [ $>$<br>2 $\sigma$ ( <i>I</i> )] | 0.0210, 0.0553                                                    | 0.0670, 0.1616                                                                                                                                                         | 0.0431, 0.0936                                                                                                                                                         |
| <i>R</i> <sub>1</sub> , <i>wR</i> <sub>2</sub> (all<br>data)                     | 0.0238, , 0.0561                                                  | 0.0932, 0.1788                                                                                                                                                         | 0.0744, 0.1006                                                                                                                                                         |
| GooF on <i>F</i> <sup>2</sup>                                                    | 1.048                                                             | 1.014                                                                                                                                                                  | 0.857                                                                                                                                                                  |
| largest diff.<br>peak, hole/<br>e·Å <sup>3</sup>                                 | 0.473, -0.337                                                     | 2.028, -1.039                                                                                                                                                          | 0.465, -0.345                                                                                                                                                          |
| CCDC number                                                                      | 2078067                                                           | 2078069                                                                                                                                                                | 2078070                                                                                                                                                                |

## 5 Computational Details

The calculations were conducted using a DFT focused methodology – using the Becke’s 3-parameter<sup>[S14]</sup> hybrid functional combined with the non-local correlation functions designed by Perdew-Yang (B3PW91).<sup>[S15]</sup> In addition to this Grimme’s D3 version of dispersion with Becke-Johnson damping<sup>[S16]</sup> was included using the keyword GD3BJ. All calculations were computed using the Gaussian09 software.<sup>[S17]</sup> The strontium atom was treated with a small-core Stuttgart Dresden relativistic effective core potential (SDDALL) in combination with a double quality basis set – SDDALL<sup>[S18]</sup> Carbon, hydrogen, nitrogen, and boron atoms were described using a double  $\zeta$  6-31G\*\* basis set including d and p polarization respectively.<sup>[S19]</sup> Geometry optimizations of the various structures were computed without symmetry constraints. The density has been analyzed using the Natural Bonding Orbital (NBO) analysis.<sup>[S20]</sup>

### 5.1 NBO Information for $[(\text{Me}_4\text{TACD})_3\text{Sr}_3(\mu\text{-H})_4(\text{thf})]^{2+}$ (**4**)

| Complex                                                              | Natural Charges                                       |                      | NBO                                                                   |                     |                                               | WBI                                                                   |                                                                                                                                           |                               |
|----------------------------------------------------------------------|-------------------------------------------------------|----------------------|-----------------------------------------------------------------------|---------------------|-----------------------------------------------|-----------------------------------------------------------------------|-------------------------------------------------------------------------------------------------------------------------------------------|-------------------------------|
|                                                                      |                                                       |                      | Bond                                                                  | Occupancy           | Center (contribution)                         |                                                                       |                                                                                                                                           | Hybridization (contribution%) |
| $[(\text{Me}_4\text{TACD})_3\text{Sr}_3\text{H}_4(\text{THF})]^{2+}$ | Sr <sub>1</sub><br>Sr <sub>5</sub><br>Sr <sub>6</sub> | 0.79<br>0.79<br>0.99 | Sr <sub>1</sub> -H <sub>2</sub>                                       | 1.72                | Sr <sub>1</sub> (15%) ; H <sub>2</sub> (86%)  | Sr <sub>1</sub> (s17 p35 d48) ; H <sub>2</sub> (s100)                 | Sr <sub>1</sub> -H <sub>2</sub><br>Sr <sub>1</sub> -H <sub>3</sub><br>Sr <sub>1</sub> -H <sub>4</sub><br>Sr <sub>1</sub> -H <sub>11</sub> | 0.34<br>0.34<br>0.33<br>0.04  |
|                                                                      |                                                       |                      | Sr <sub>1</sub> -H <sub>3</sub>                                       | 1.71                | Sr <sub>1</sub> (14%) ; H <sub>3</sub> (86%)  | Sr <sub>1</sub> (s18 p37 d45) ; H <sub>3</sub> (s100)                 | Sr <sub>5</sub> -H <sub>2</sub><br>Sr <sub>5</sub> -H <sub>3</sub><br>Sr <sub>5</sub> -H <sub>4</sub><br>Sr <sub>5</sub> -H <sub>11</sub> | 0.34<br>0.33<br>0.34<br>0.33  |
|                                                                      |                                                       |                      | Sr <sub>1</sub> -H <sub>4</sub>                                       | 1.74                | Sr <sub>1</sub> (13%) ; H <sub>4</sub> (87%)  | Sr <sub>1</sub> (s20 p36 d44) ; H <sub>4</sub> (s100)                 | Sr <sub>6</sub> -H <sub>2</sub><br>Sr <sub>6</sub> -H <sub>3</sub><br>Sr <sub>6</sub> -H <sub>4</sub><br>Sr <sub>6</sub> -H <sub>11</sub> | 0.05<br>0.33<br>0.05<br>0.33  |
|                                                                      |                                                       |                      | Sr <sub>5</sub> -H <sub>11</sub>                                      | 1.74                | Sr <sub>1</sub> (13%) ; H <sub>11</sub> (87%) | Sr <sub>1</sub> (s18 p36 d46) ; H <sub>11</sub> (s100)                |                                                                                                                                           |                               |
|                                                                      |                                                       |                      |                                                                       | <b>Second Order</b> |                                               |                                                                       |                                                                                                                                           |                               |
|                                                                      |                                                       |                      | <b>Donor</b>                                                          | <b>Acceptor</b>     |                                               | <b>Total Energy (kcal.mol<sup>-1</sup>)</b>                           |                                                                                                                                           |                               |
|                                                                      |                                                       |                      |                                                                       |                     | LP* Sr <sub>1</sub>                           | 578.81                                                                | Sr <sub>6</sub> -H <sub>2</sub><br>Sr <sub>6</sub> -H <sub>3</sub><br>Sr <sub>6</sub> -H <sub>4</sub><br>Sr <sub>6</sub> -H <sub>11</sub> | 0.03<br>0.05<br>0.28<br>0.29  |
|                                                                      |                                                       |                      |                                                                       |                     | LP* Sr <sub>5</sub>                           | 944.88                                                                |                                                                                                                                           |                               |
|                                                                      |                                                       |                      |                                                                       |                     | LP* Sr <sub>6</sub>                           | 231.56                                                                |                                                                                                                                           |                               |
|                                                                      |                                                       |                      | H <sub>2</sub><br>H <sub>3</sub><br>H <sub>4</sub><br>H <sub>11</sub> |                     | LP* Sr <sub>1</sub>                           | 397.83                                                                | Sr <sub>1</sub> -<br>Sr <sub>5</sub><br>Sr <sub>1</sub> -<br>Sr <sub>6</sub>                                                              | 0.22<br>0.11<br>0.12          |
|                                                                      |                                                       |                      |                                                                       |                     | LP* Sr <sub>5</sub>                           | 935.55                                                                |                                                                                                                                           |                               |
|                                                                      |                                                       |                      |                                                                       |                     | LP* Sr <sub>6</sub>                           | 169.07                                                                |                                                                                                                                           |                               |
|                                                                      |                                                       |                      |                                                                       |                     | LP* Sr <sub>1</sub>                           | 261.52                                                                | Sr <sub>5</sub> -<br>Sr <sub>6</sub>                                                                                                      | 2.32<br>2.32                  |
|                                                                      |                                                       |                      |                                                                       |                     | LP* Sr <sub>5</sub>                           | 220.15                                                                |                                                                                                                                           |                               |
|                                                                      |                                                       |                      |                                                                       |                     | LP* Sr <sub>6</sub>                           | 372.77                                                                | Sr <sub>1</sub><br>Sr <sub>5</sub><br>Sr <sub>6</sub>                                                                                     | 1.94<br>0.78<br>0.78          |
|                                                                      |                                                       |                      |                                                                       | LP* Sr <sub>1</sub> | 73.77                                         |                                                                       |                                                                                                                                           |                               |
|                                                                      |                                                       |                      |                                                                       | LP* Sr <sub>5</sub> | 415.19                                        |                                                                       |                                                                                                                                           |                               |
|                                                                      |                                                       |                      |                                                                       | LP* Sr <sub>6</sub> | 671.89                                        | H <sub>2</sub><br>H <sub>3</sub><br>H <sub>4</sub><br>H <sub>11</sub> | 0.73<br>0.74                                                                                                                              |                               |



## 5.2 Orbitals and bond length for $[(\text{Me}_4\text{TACD})_3\text{Sr}_3(\mu\text{-H})_4(\text{thf})]^{2+}$ (4)

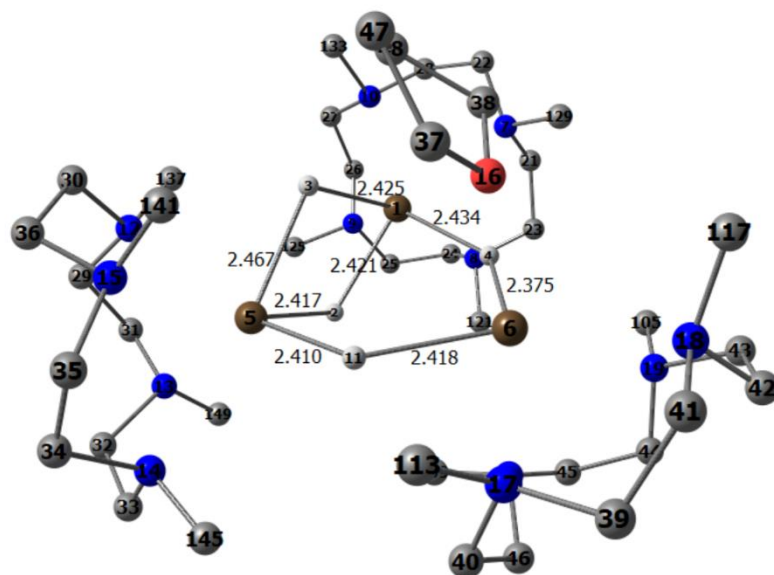

Bond length and atom numbers

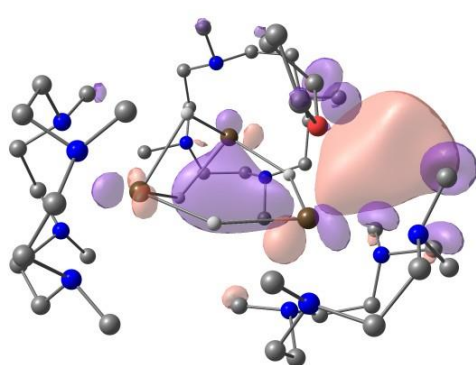

LUMO (229)

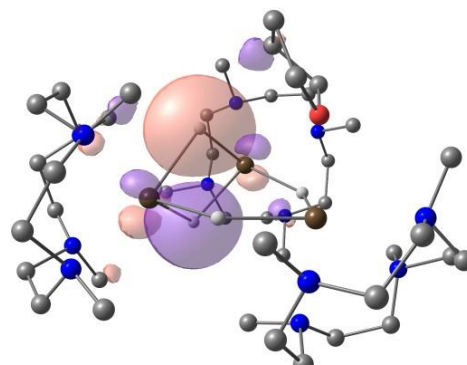

HOMO (228)

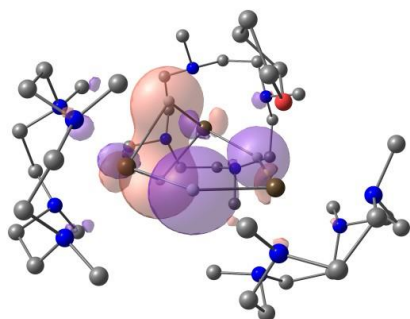

HOMO-1 (227)

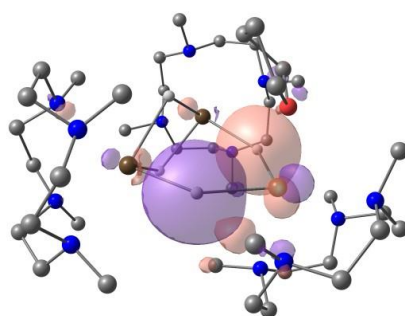

HOMO-2 (226)

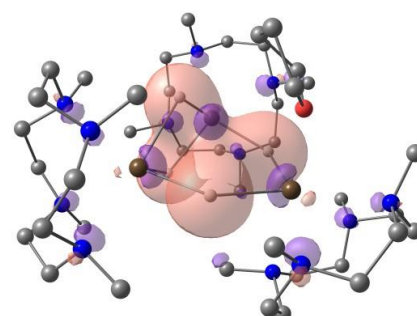

HOMO-3 (225)

### 5.3 NBO Information for 5

| Complex                                                                      | Natural Charges                  |                | NBO               |                  |                                        | WBI                                      |                   |                               |
|------------------------------------------------------------------------------|----------------------------------|----------------|-------------------|------------------|----------------------------------------|------------------------------------------|-------------------|-------------------------------|
|                                                                              |                                  |                | Bond              | Occupancy        | Center (contribution)                  |                                          |                   | Hybridization (contribution%) |
| [(Me <sub>4</sub> TACD) <sub>2</sub> CaSrH <sub>2</sub> (THF)] <sup>2+</sup> | Sr                               | 0.93           | Sr-H <sub>2</sub> | 1.77             | Sr (14%) ; H <sub>2</sub> (86%)        | Sr (s17 p35 d48) ; H <sub>2</sub> (s100) | Sr-H <sub>2</sub> | 0.37                          |
|                                                                              |                                  |                | Sr-H <sub>3</sub> | 1.78             | Sr (14%) ; H <sub>3</sub> (86%)        | Sr (s18 p35 d47) ; H <sub>3</sub> (s100) | Sr-H <sub>3</sub> | 0.38                          |
|                                                                              | Ca                               | 1.23           | Second Order      |                  |                                        | Ca-H <sub>2</sub>                        | 0.31              |                               |
|                                                                              |                                  |                | Donor             | Acceptor         | Total Energy (kcal.mol <sup>-1</sup> ) | Ca-H <sub>3</sub>                        | 0.30              |                               |
|                                                                              | H <sub>2</sub><br>H <sub>3</sub> | -0.53<br>-0.53 | Sr-H <sub>2</sub> | LP* Sr<br>LP* Ca | 80.99<br>189.5                         | Ca-Sr                                    | 0.17              |                               |
|                                                                              |                                  |                | Sr-H <sub>3</sub> | LP* Ca           | 200.66                                 | Sr                                       | 2.02              |                               |
|                                                                              |                                  |                | LP* Sr            | LP* Ca           | 48.88                                  | Ca                                       | 1.48              |                               |
|                                                                              |                                  |                |                   |                  | H <sub>2</sub>                         | 0.73                                     |                   |                               |
|                                                                              |                                  |                |                   |                  | H <sub>3</sub>                         | 0.72                                     |                   |                               |

### 5.4 Orbitals and bond length for [(Me<sub>4</sub>TACD)<sub>2</sub>CaSrH<sub>2</sub>(THF)]<sup>2+</sup> (5)

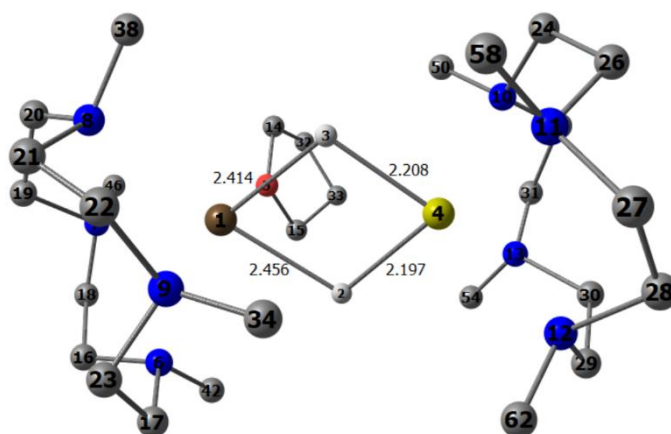

Bond length and atom numbers

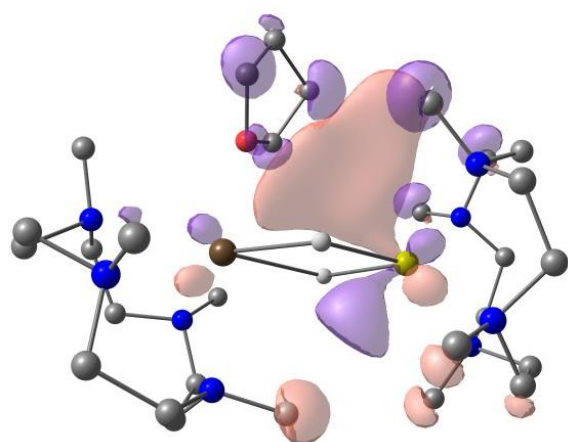

LUMO (164)

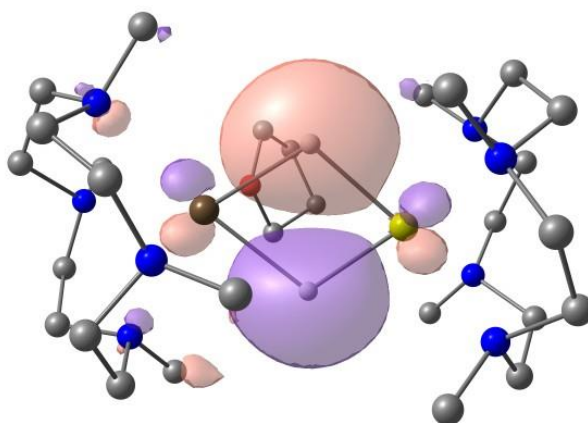

HOMO (163)

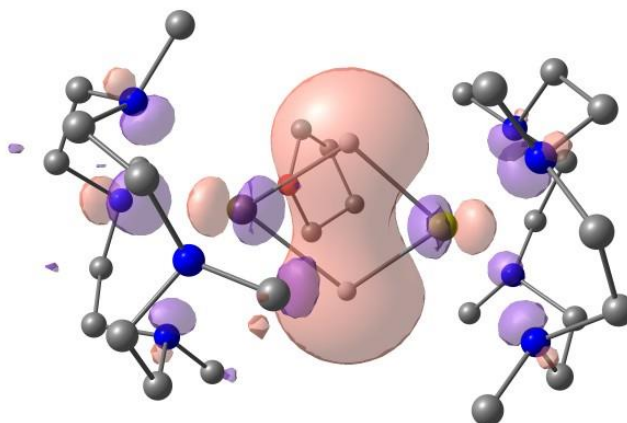

HOMO-1 (162)

### Cartesian coordinates of optimized structures

$[(\text{Me}_4\text{TACD})_3\text{Sr}_3\text{H}_4(\text{THF})]^{2+}$  (**4**)

152

|    |           |           |           |
|----|-----------|-----------|-----------|
| Sr | -1.710140 | 16.569870 | 6.241224  |
| H  | 0.201865  | 17.765583 | 5.361597  |
| H  | -0.585593 | 14.969747 | 4.807875  |
| H  | -0.376968 | 15.811086 | 8.130794  |
| Sr | 1.551866  | 16.080128 | 4.275531  |
| Sr | 1.708635  | 14.741385 | 8.512849  |
| N  | -3.712702 | 15.816330 | 8.121113  |
| N  | -2.241134 | 18.532106 | 8.012023  |
| N  | -2.887137 | 18.865921 | 5.080605  |
| N  | -4.249032 | 16.141939 | 5.180121  |
| H  | 2.490185  | 15.061025 | 6.247250  |
| N  | 0.336180  | 15.830949 | 1.790095  |
| N  | 2.160398  | 18.173179 | 2.532815  |
| N  | 4.309108  | 16.309430 | 3.480955  |
| N  | 2.453474  | 13.964699 | 2.809600  |
| O  | 0.767035  | 12.472899 | 7.741452  |
| N  | 4.375956  | 14.121384 | 8.564844  |
| N  | 2.468938  | 13.040669 | 10.658424 |
| N  | 1.352363  | 15.820056 | 11.139748 |
| N  | 3.218950  | 16.934303 | 9.009829  |

|   |           |           |           |
|---|-----------|-----------|-----------|
| C | -4.066528 | 17.044162 | 8.849246  |
| C | -4.886270 | 15.259691 | 7.433017  |
| C | -2.866140 | 17.916242 | 9.189038  |
| C | -3.053103 | 19.624533 | 7.468839  |
| C | -2.695701 | 19.970683 | 6.032583  |
| C | -4.307739 | 18.615588 | 4.807644  |
| C | -4.555840 | 17.226337 | 4.233632  |
| C | -5.299692 | 16.049934 | 6.203416  |
| C | 0.885594  | 16.820450 | 0.855526  |
| C | 0.527443  | 14.456392 | 1.308589  |
| C | 1.116830  | 18.182545 | 1.497212  |
| C | 3.491979  | 18.082694 | 1.921529  |
| C | 4.567216  | 17.632817 | 2.895427  |
| C | 4.567158  | 15.246973 | 2.498222  |
| C | 3.919365  | 13.919615 | 2.859980  |
| C | 1.960165  | 13.960564 | 1.428455  |
| C | 1.351257  | 11.416544 | 6.951816  |
| C | -0.656226 | 12.500303 | 7.521138  |
| C | 4.785805  | 13.489480 | 9.823906  |
| C | 5.072284  | 15.393576 | 8.324453  |
| C | 3.777793  | 12.460674 | 10.317676 |
| C | 2.556908  | 13.776133 | 11.927783 |
| C | 1.408936  | 14.745506 | 12.141648 |
| C | 2.419265  | 16.804808 | 11.373143 |
| C | 2.701222  | 17.682511 | 10.164135 |
| C | 4.620457  | 16.540281 | 9.217943  |
| C | 0.231115  | 10.867597 | 6.062203  |
| C | -0.831951 | 11.969482 | 6.112724  |
| H | -4.598516 | 16.795745 | 9.782962  |
| H | -4.773913 | 17.616272 | 8.245049  |
| H | -3.174761 | 18.681601 | 9.921074  |
| H | -2.103157 | 17.300486 | 9.670368  |
| H | -2.950961 | 20.534254 | 8.083999  |
| H | -4.106470 | 19.339618 | 7.527361  |
| H | -1.641448 | 20.256887 | 5.976485  |
| H | -3.276362 | 20.857816 | 5.728135  |
| H | -4.713966 | 19.365937 | 4.109491  |
| H | -4.870040 | 18.736084 | 5.736474  |
| H | -3.927991 | 17.078347 | 3.349431  |
| H | -5.599525 | 17.161058 | 3.884062  |
| H | -5.582516 | 17.062342 | 6.498999  |
| H | -6.210725 | 15.592334 | 5.782773  |
| H | -5.753589 | 15.188308 | 8.110871  |
| H | -4.642238 | 14.232721 | 7.144912  |
| H | -1.150834 | 11.868835 | 8.272786  |
| H | -0.972568 | 13.541131 | 7.646947  |
| H | -0.624646 | 12.782746 | 5.407335  |
| H | -1.839806 | 11.588383 | 5.927941  |
| H | 0.580364  | 10.654991 | 5.049487  |
| H | -0.162996 | 9.935387  | 6.477618  |
| H | 2.169633  | 11.857073 | 6.377566  |
| H | 1.763884  | 10.654579 | 7.623155  |
| H | 6.163551  | 15.272702 | 8.432659  |
| H | 4.880573  | 15.656227 | 7.282669  |
| H | 4.750693  | 16.264255 | 10.267155 |
| H | 5.291532  | 17.398381 | 9.046784  |
| H | 1.780187  | 18.179026 | 9.845304  |
| H | 3.397474  | 18.484601 | 10.460638 |
| H | 2.170077  | 17.450780 | 12.231376 |
| H | 3.329993  | 16.271032 | 11.653837 |
| H | 0.457601  | 14.206553 | 12.098572 |

|   |           |           |           |
|---|-----------|-----------|-----------|
| H | 1.479390  | 15.159422 | 13.161599 |
| H | 2.592010  | 13.076754 | 12.779295 |
| H | 3.502964  | 14.320907 | 11.948383 |
| H | 4.208098  | 11.923235 | 11.178962 |
| H | 3.610882  | 11.707741 | 9.541354  |
| H | 4.916785  | 14.269093 | 10.578065 |
| H | 5.768583  | 13.001313 | 9.718739  |
| H | 4.316758  | 13.133425 | 2.196457  |
| H | 4.202968  | 13.638121 | 3.878794  |
| H | 5.652028  | 15.092887 | 2.371895  |
| H | 4.194972  | 15.577531 | 1.525854  |
| H | 5.543436  | 17.658503 | 2.382564  |
| H | 4.639773  | 18.348985 | 3.719716  |
| H | 3.443832  | 17.384299 | 1.082988  |
| H | 3.791193  | 19.052562 | 1.490377  |
| H | 0.192310  | 18.530568 | 1.967117  |
| H | 1.353618  | 18.913281 | 0.705556  |
| H | 0.219854  | 16.947589 | -0.014392 |
| H | 1.829118  | 16.437771 | 0.459308  |
| H | -0.131941 | 13.816631 | 1.902128  |
| H | 0.202745  | 14.351870 | 0.259572  |
| H | 2.618722  | 14.589270 | 0.824151  |
| H | 2.020841  | 12.949597 | 0.991642  |
| C | 0.048734  | 16.478010 | 11.240727 |
| H | -0.017193 | 17.295109 | 10.524194 |
| H | -0.742264 | 15.764873 | 10.999127 |
| H | -0.130025 | 16.879402 | 12.251593 |
| C | 3.082603  | 17.748003 | 7.797059  |
| H | 3.618305  | 18.707199 | 7.884111  |
| H | 3.466908  | 17.189627 | 6.942289  |
| H | 2.025590  | 17.944476 | 7.591846  |
| C | 4.637572  | 13.221803 | 7.437275  |
| H | 5.717010  | 13.078329 | 7.269006  |
| H | 4.194980  | 12.241503 | 7.624926  |
| H | 4.164429  | 13.642857 | 6.544913  |
| C | 1.481153  | 11.962981 | 10.783468 |
| H | 1.375259  | 11.449577 | 9.827818  |
| H | 1.763601  | 11.235668 | 11.560361 |
| H | 0.502763  | 12.374225 | 11.043295 |
| C | -0.892403 | 18.996417 | 8.342306  |
| H | -0.896865 | 19.740135 | 9.156039  |
| H | -0.294754 | 18.125851 | 8.629242  |
| H | -0.416400 | 19.431149 | 7.461340  |
| C | -2.196419 | 19.220748 | 3.838198  |
| H | -1.118256 | 19.183205 | 4.013335  |
| H | -2.442823 | 18.502939 | 3.054657  |
| H | -2.489058 | 20.219999 | 3.478086  |
| C | -3.185706 | 14.821458 | 9.057574  |
| H | -3.890955 | 14.613490 | 9.878750  |
| H | -2.996708 | 13.886871 | 8.524984  |
| H | -2.230677 | 15.162844 | 9.460042  |
| C | -4.134249 | 14.870531 | 4.459199  |
| H | -3.889943 | 14.060993 | 5.150907  |
| H | -5.065237 | 14.605675 | 3.933321  |
| H | -3.321709 | 14.929326 | 3.732131  |
| C | -1.093881 | 16.063796 | 1.989101  |
| H | -1.670769 | 15.915608 | 1.061347  |
| H | -1.444730 | 15.389792 | 2.774288  |
| H | -1.255416 | 17.083926 | 2.337929  |
| C | 1.890959  | 12.850381 | 3.571313  |
| H | 0.800447  | 12.893218 | 3.551557  |

|   |          |           |          |
|---|----------|-----------|----------|
| H | 2.219774 | 11.871940 | 3.184595 |
| H | 2.197902 | 12.952180 | 4.615843 |
| C | 5.181050 | 16.125918 | 4.640066 |
| H | 4.972162 | 15.169450 | 5.119473 |
| H | 6.248419 | 16.164382 | 4.366721 |
| H | 4.986219 | 16.914505 | 5.371225 |
| C | 2.057954 | 19.391387 | 3.344250 |
| H | 1.119840 | 19.376888 | 3.904182 |
| H | 2.865737 | 19.422053 | 4.079568 |
| H | 2.121496 | 20.302688 | 2.728637 |

$[(\text{Me}_4\text{TACD})_2\text{CaSrH}_2(\text{THF})]^{2+}$  (**5**)

105

|    |           |           |           |
|----|-----------|-----------|-----------|
| Sr | 14.882511 | 9.409872  | 6.966817  |
| H  | 15.730411 | 8.087230  | 8.853940  |
| H  | 13.601215 | 9.905328  | 8.951526  |
| Ca | 14.517461 | 8.719404  | 10.572897 |
| O  | 16.658639 | 11.118773 | 7.665528  |
| N  | 15.978039 | 7.400165  | 5.551004  |
| N  | 15.682561 | 10.198824 | 4.427524  |
| N  | 12.807123 | 10.258110 | 5.428400  |
| N  | 13.095987 | 7.438727  | 6.511068  |
| N  | 14.325015 | 10.707491 | 12.112976 |
| N  | 12.241778 | 8.520620  | 11.729629 |
| N  | 14.427161 | 6.487156  | 11.813400 |
| N  | 16.484196 | 8.680190  | 12.208434 |
| C  | 16.518815 | 12.530362 | 7.953687  |
| C  | 17.948965 | 10.650473 | 8.111544  |
| C  | 16.139091 | 7.747462  | 4.130781  |
| C  | 15.120852 | 6.213870  | 5.711706  |
| C  | 16.608982 | 9.177064  | 3.907791  |
| C  | 14.484770 | 10.300461 | 3.576187  |
| C  | 13.317359 | 10.996694 | 4.259744  |
| C  | 12.000429 | 9.104136  | 4.996648  |
| C  | 11.827851 | 8.045061  | 6.074494  |
| C  | 13.638690 | 6.506720  | 5.510821  |
| C  | 12.909140 | 10.802480 | 12.515524 |
| C  | 15.205178 | 10.534297 | 13.281154 |
| C  | 12.301444 | 9.453254  | 12.871525 |
| C  | 12.046819 | 7.135534  | 12.196644 |
| C  | 13.312374 | 6.522947  | 12.778387 |
| C  | 15.717648 | 6.318742  | 12.509886 |
| C  | 16.212265 | 7.596272  | 13.169884 |
| C  | 16.570540 | 9.977177  | 12.903873 |
| C  | 17.846082 | 12.967189 | 8.567631  |
| C  | 18.389858 | 11.662580 | 9.153761  |
| C  | 12.896406 | 6.754642  | 7.787713  |
| H  | 12.146840 | 5.949982  | 7.717301  |
| H  | 13.840402 | 6.334001  | 8.135513  |
| H  | 12.562560 | 7.489145  | 8.527142  |
| C  | 12.004554 | 11.151877 | 6.273849  |
| H  | 11.123167 | 11.540740 | 5.741668  |
| H  | 11.679025 | 10.629382 | 7.175205  |
| H  | 12.614490 | 12.000850 | 6.595964  |
| C  | 17.285828 | 7.150105  | 6.171793  |
| H  | 17.148764 | 7.001156  | 7.246608  |
| H  | 17.787806 | 6.273109  | 5.735903  |
| H  | 17.940844 | 8.014154  | 6.032317  |

|   |           |           |           |
|---|-----------|-----------|-----------|
| C | 16.379189 | 11.490067 | 4.460888  |
| H | 15.708799 | 12.274912 | 4.817813  |
| H | 17.225145 | 11.433164 | 5.148711  |
| H | 16.746366 | 11.784278 | 3.466041  |
| C | 14.701733 | 11.903227 | 11.349196 |
| H | 15.752224 | 11.844822 | 11.053799 |
| H | 14.099143 | 11.945151 | 10.438293 |
| H | 14.560872 | 12.825749 | 11.931693 |
| C | 17.736012 | 8.414256  | 11.486448 |
| H | 18.592256 | 8.323137  | 12.171238 |
| H | 17.649357 | 7.500348  | 10.897078 |
| H | 17.931692 | 9.229172  | 10.787478 |
| C | 11.142276 | 8.901141  | 10.830945 |
| H | 11.329232 | 9.885510  | 10.400618 |
| H | 11.084223 | 8.191016  | 10.003001 |
| H | 10.173452 | 8.906392  | 11.352308 |
| C | 14.245905 | 5.381519  | 10.863442 |
| H | 15.024033 | 5.431485  | 10.097147 |
| H | 14.295966 | 4.401458  | 11.360211 |
| H | 13.274779 | 5.460129  | 10.370885 |
| H | 11.365312 | 8.496480  | 6.957441  |
| H | 11.125027 | 7.278728  | 5.709226  |
| H | 12.475056 | 8.659817  | 4.118577  |
| H | 11.002284 | 9.433695  | 4.666082  |
| H | 13.626160 | 11.988706 | 4.602999  |
| H | 12.519579 | 11.166557 | 3.519277  |
| H | 14.184062 | 9.292203  | 3.282542  |
| H | 14.717964 | 10.833371 | 2.640380  |
| H | 15.183105 | 7.590977  | 3.625217  |
| H | 16.853591 | 7.065332  | 3.642782  |
| H | 17.573591 | 9.330061  | 4.402059  |
| H | 16.792526 | 9.323296  | 2.830959  |
| H | 15.287490 | 5.828006  | 6.721491  |
| H | 15.422035 | 5.411987  | 5.018700  |
| H | 13.084967 | 5.553877  | 5.523514  |
| H | 13.479091 | 6.934868  | 4.518408  |
| H | 16.448195 | 5.975278  | 11.772415 |
| H | 15.651042 | 5.525855  | 13.270670 |
| H | 17.115734 | 7.365034  | 13.755875 |
| H | 15.467831 | 7.952053  | 13.887221 |
| H | 17.195542 | 9.906846  | 13.807457 |
| H | 17.080619 | 10.676014 | 12.234605 |
| H | 15.341724 | 11.487398 | 13.815405 |
| H | 14.712671 | 9.860168  | 13.986441 |
| H | 13.083655 | 5.510943  | 13.146877 |
| H | 13.632302 | 7.096943  | 13.651431 |
| H | 11.241484 | 7.074985  | 12.945048 |
| H | 11.711684 | 6.544721  | 11.339116 |
| H | 11.294936 | 9.615378  | 13.287829 |
| H | 12.887961 | 8.986967  | 13.667471 |
| H | 12.787878 | 11.486566 | 13.369408 |
| H | 12.360189 | 11.246710 | 11.681119 |
| H | 15.678838 | 12.646054 | 8.645974  |
| H | 16.284929 | 13.057655 | 7.024638  |
| H | 17.913917 | 11.446564 | 10.117307 |
| H | 19.471457 | 11.673757 | 9.303204  |
| H | 18.522641 | 13.342929 | 7.794200  |
| H | 17.718670 | 13.756711 | 9.311194  |
| H | 18.641569 | 10.631601 | 7.259639  |
| H | 17.810258 | 9.632537  | 8.488673  |

## 6. References

- [S1] a) V. Leich, T. P. Spaniol, L. Maron and J. Okuda, *Angew. Chem. Int. Ed.*, **2016**, *55*, 4794-4797; b) A. Causero, G. Ballmann, J. Pahl, H. Zijlstra, C. Farber and S. Harder, *Organometallics*, **2016**, *35*, 3350-3360; c) A. S. S. Wilson, M. S. Hill and M. F. Mahon, *Organometallics*, **2018**, *38*, 351-360. d) M. S. Hill, M. F. Mahon, A. S. S. Wilson, C. Dinoi, L. Maron and E. Richards, *Chem. Commun.*, **2019**, *55*, 5732-5735.
- [S2] J. H. Coates, D. A. Hadi and S. F. Lincoln, *Aust. J. Chem.*, **1982**, *35*, 903-909.
- [S3] K. Izod, D. G. Rayner, S. M. El-Hamruni, R. W. Harrington and U. Baisch, *Angew. Chem. Int. Ed.*, **2014**, *53*, 3636-3640.
- [S4] D. Schuhknecht, C. Lhotzky, T. P. Spaniol, L. Maron and J. Okuda, *Angew. Chem. Int. Ed.*, **2017**, *56*, 12367-12371.
- [S5] K. Izod and P. G. Waddell, *Organometallics*, **2015**, *34*, 2726-2730.
- [S6] G. M. Sheldrick, *Acta Cryst.*, **2015**, *A71*, 3-8.
- [S7] G. M. Sheldrick, *Acta Cryst.*, **2015**, *C71*, 3-8.
- [S8] O. V. Dolomanov, J. L. Bourhis, R. J. Gildea, J. A. K. Howard and H. Puschmann, *J. Appl. Cryst.*, **2009**, *42*, 339-341.
- [S9] P. van der Sluis, A. L. Spek, *Acta Crystallogr.* **1990**, *A46*, 194-201.
- [S10] A. L. Spek, *Acta Crystallogr. Biol. Crystallogr.* **2009**, *B65*, 148-155.
- [S11] P. Luger, J. Buschmann, *Angew. Chemie Int. Ed.* **1983**, *22*, 410.
- [S12] K. M. Fromm, E. D. Gueneau, G. Bernardinelli, H. Goesmann, J. Weber, M.-J. Mayor-López, P. Boulet, H. Chermette, *J. Am. Chem. Soc.* **2003**, *125*, 3593-3604.
- [S13] K. Brandenburg, Diamond Version 4.6.4. Crystal Impact, Bonn, Germany, 2020.
- [S14] A. D. Becke, *J. Chem. Phys.*, **1993**, *98*, 5648-5652.
- [S15] J. P. Perdew and Y. Wang, *Phys. Rev. B: Condens. Matter*, **1992**, *45*, 13244.
- [S16] S. Grimme, S. Ehrlich and L. Goerigk, *J. Comp. Chem.*, **2011**, *32*, 1456-1465.
- [S17] Gaussian 09, Revision D.01, M. J. Frisch, G. W. Trucks, H. B. Schlegel, G. E. Scuseria, M. A. Robb, J. R. Cheeseman, G. Scalmani, V. Barone, B. Mennucci, G. A. Petersson, H. Nakatsuji, M. Caricato, X. Li, H. P. Hratchian, A. F. Izmaylov, J. Bloino, G. Zheng, J. L. Sonnenberg, M. Hada, M. Ehara, K. Toyota, R. Fukuda, J. Hasegawa, M. Ishida, T. Nakajima, Y. Honda, O. Kitao, H. Nakai, T. Vreven, J. A. Montgomery, Jr., J. E. Peralta, F. Ogliaro, M. Bearpark, J. J. Heyd, E. Brothers, K. N. Kudin, V. N. Staroverov, R. Kobayashi, J. Normand, K. Raghavachari, A. Rendell, J. C. Burant, S. S. Iyengar, J. Tomasi, M. Cossi, N. Rega, J. M. Millam, M. Klene, J.



E. Knox, J. B. Cross, V. Bakken, C. Adamo, J. Jaramillo, R. Gomperts, R. E. Stratmann, O. Yazyev, A. J. Austin, R. Cammi, C. Pomelli, J. W. Ochterski, R. L. Martin, K. Morokuma, V. G. Zakrzewski, G. A. Voth, P. Salvador, J. J. Dannenberg, S. Dapprich, A. D. Daniels, Ö. Farkas, J. B. Foresman, J. V. Ortiz, J. Cioslowski and D. J. Fox, Gaussian, Inc., Wallingford CT, 2009.

[S18] M. Dolg., U. Wedig, H. Stoll and H. Preuss, *J. Chem. Phys.*, **1987**, *86*, 866-872.

[S19] P. C. Hariharan and J. A. Pople, *Theor. Chim. Acta*, **1973**, *28*, 213–222.

[S20] a) A. E. Reed, L. A. Agtiss and F. Weinhold, *Chem. Rev.*, **1988**, *88*, 899-926; b) F. Weinhold, In *Encyclopedia of Computational Chemistry*; P. v. R. Schleyer, Ed., J. Wiley & Sons: Chichester, pp 1792, 1998.
